# Supplementary material for: Rapid rEcognition of COrticosteRoiD resistant or sensitive Sepsis (RECORDS): study protocol for a multicentre, placebo-controlled, biomarker-guided, adaptive Bayesian design basket trial
Source: PubMed Central journal article supplement — BMJ Open. 2023 Mar 10;13(3):e066496. doi: 10.1136/bmjopen-2022-066496 (PMC10008229; doi:10.1136/bmjopen-2022-066496), 2023-03-10

# BMJ Open

BMJ Open is committed to open peer review. As part of this commitment we make the peer review history of every article we publish publicly available.

When an article is published we post the peer reviewers' comments and the authors' responses online. We also post the versions of the paper that were used during peer review. These are the versions that the peer review comments apply to.

The versions of the paper that follow are the versions that were submitted during the peer review process. They are not the versions of record or the final published versions. They should not be cited or distributed as the published version of this manuscript.

BMJ Open is an open access journal and the full, final, typeset and author-corrected version of record of the manuscript is available on our site with no access controls, subscription charges or pay-per-view fees (<http://bmjopen.bmj.com>).

If you have any questions on BMJ Open's open peer review process please email [info.bmjopen@bmj.com](mailto:info.bmjopen@bmj.com)

# BMJ Open

**Rapid rEcognition of COrticosteROI D resistant or sensitive Sepsis (RECORDS): study protocol for a Multicenter, placebo-controlled, biomarker-guided, adaptive Bayesian design Basket trial.**

|                               |                                                                                                                                                                                                                                                                                                                          |
|-------------------------------|--------------------------------------------------------------------------------------------------------------------------------------------------------------------------------------------------------------------------------------------------------------------------------------------------------------------------|
| Journal:                      | <i>BMJ Open</i>                                                                                                                                                                                                                                                                                                          |
| Manuscript ID                 | bmjopen-2022-066496                                                                                                                                                                                                                                                                                                      |
| Article Type:                 | Protocol                                                                                                                                                                                                                                                                                                                 |
| Date Submitted by the Author: | 08-Jul-2022                                                                                                                                                                                                                                                                                                              |
| Complete List of Authors:     | Fleuriet, Jérôme; APHP University Versailles Saint Quentin - University Paris Saclay, Department of Intensive Care<br>heming, nicholas; Hopital Raymond-Poincare, General intensive care unit<br>Chevret, Sylvie; University of Paris<br>Annane, Djillali; Universite Paris-Saclay, Department of Intensive Care; INSERM |
| Keywords:                     | Adult intensive & critical care < INTENSIVE & CRITICAL CARE, Clinical trials < THERAPEUTICS, Respiratory infections < THORACIC MEDICINE                                                                                                                                                                                  |
|                               |                                                                                                                                                                                                                                                                                                                          |

SCHOLARONE™  
Manuscripts

1  
2  
3 Rapid rEcognition of COrticosteRoiD resistant or sensitive Sepsis (RECORDS): study protocol  
4  
5 for a Multicenter, placebo-controlled, biomarker-guided, adaptive Bayesian design Basket trial.  
6  
7  
8  
9  
10  
11  
12  
13

14 Jérôme Fleuriet PhD<sup>1,4</sup>, Nicholas Heming MD<sup>1,2,3,4</sup>, Sylvie Chevret MD<sup>5</sup>, Djillali Annane  
15 MD<sup>1,2,3,4</sup> for the RECORDS consortium  
16  
17  
18  
19  
20  
21  
22  
23  
24  
25  
26  
27  
28  
29  
30

31 1- Department of Intensive Care, Raymond Poincaré Hospital, APHP University Versailles Saint  
32 Quentin - University Paris Saclay, France.  
33  
34

35 2- Laboratory of Infection & Inflammation - U1173, School of Medicine Simone Veil, University  
36 Versailles Saint Quentin - University Paris Saclay, INSERM, Garches, France.  
37  
38

39 3- FHU SEPSIS (Saclay and Paris Seine Nord Endeavour to PerSonalize Interventions for Sepsis),  
40 Garches 92380, France  
41  
42  
43

44 4- RHU RECORDS (Rapid rEcognition of COrticosteroiD resistant or sensitive Sepsis), Garches  
45 92380, France  
46  
47  
48

49 5-Service de Biostatistique, Hôpital Saint-Louis (AP-HP), Université de Paris, INSERM  
50 UMR1153, France.  
51  
52  
53  
54  
55  
56  
57  
58  
59  
60

1  
2  
3  
4  
5 Correspondence to : Professor Djillali Annane, General ICU, Raymond Poincaré hospital  
6  
7 (APHP), School of medicine Simone Veil (University Paris Saclay-campus University of  
8  
9 Versailles SQY), 104 boulevard Raymond Poincaré, 92380 Garches, France  
10  
11

12 Phone: +33 1 47107778  
13

14 Email: [djillali.annane@aphp.fr](mailto:djillali.annane@aphp.fr)  
15  
16  
17  
18  
19  
20  
21  
22  
23  
24  
25  
26  
27  
28  
29  
30  
31  
32  
33  
34  
35  
36  
37  
38  
39  
40  
41  
42  
43  
44  
45  
46  
47  
48  
49  
50  
51  
52  
53  
54  
55  
56  
57  
58  
59  
60

**Abstract (231)**

**Introduction.** Corticosteroids affect variably survival in sepsis trials, suggesting heterogeneity in patients' response to corticosteroids. The RECORDS trial aimed at defining endotypes associated with adults with sepsis responsiveness to corticosteroids.

**Methods and analysis.** RECORDS a multicenter, placebo-controlled, biomarker-guided, adaptive Bayesian design Basket trial will randomly assigned to a biomarker stratum 1800 adults with community acquired pneumonia, vasopressor dependent sepsis, septic shock, or Acute Respiratory Distress Syndrome. In each stratum, patients will be randomly assigned to receive a 7-day course of hydrocortisone and fludrocortisone or their placebos. COVID-19 patients be treated with a 10-day standard course of dexamethasone and randomized to fludrocortisone or its placebo. Primary outcome will be 90-day death or persistent organ dysfunction. Large simulation study will be performed across a range of plausible scenarios to foresee power to detect a 5-10% absolute difference with corticosteroids. We will assess subset-by-treatment interaction by estimating in a Bayesian framework two quantities: (i) measure of influence, relying on the value of the estimation of corticosteroids effect in each subset, and (ii) measure of interaction.

**Ethics and dissemination.** The protocol was approved by the Ethics Committee (*Comité de Protection des Personnes*, CPP Dijon, France), on April 6, 2020. Trial results will be disseminated at scientific conferences and results will be published in peer reviewed journals.

**Registration.** ClinicalTrials.gov number NCT04280497.

**Protocol version N°5.2 dated 15/09/2021**

1  
2  
3 **Key words:** adults, precision medicine, community acquired pneumonia, ARDS, sepsis,  
4  
5 endotypes, multiomics, biomarkers  
6

7  
8 **Words count:** 3890  
9

## 10 11 12 **Article summary** 13

### 14 15 Strengths and limitations of this study

- 16  
17 - Increasing evidence suggests heterogeneity in the response to corticosteroids among  
18 patients with sepsis, that might be unmasked by endotyping individual immune response  
19 to infection.  
20  
21
- 22  
23 - So far, there are no data from randomized trial evaluating endotypes-guided  
24 corticotherapy in patients with sepsis.  
25  
26
- 27  
28 - This protocol shows the methodology of an adaptive trial integrating and evaluating  
29 novel biomarkers stemming from bench-side and in silico research.  
30  
31
- 32  
33 - The RECORDS trial will provide the first data from adequately powered randomized trial  
34 of the value of biomarkers, including serum levels of proteins, cellular markers, and multi-  
35 omics, and of intelligent algorithms to identify the best sepsis population to be selected for  
36 corticotherapy and those who should not be treated with corticosteroids.  
37  
38  
39  
40  
41  
42  
43  
44  
45  
46  
47  
48  
49  
50  
51  
52  
53  
54  
55  
56  
57  
58  
59  
60

1  
2  
3  
4  
5  
6  
7  
8  
9  
10  
11  
12  
13  
14  
15  
16  
17  
18  
19  
20  
21  
22  
23  
24  
25  
26  
27  
28  
29  
30  
31  
32  
33  
34  
35  
36  
37  
38  
39  
40  
41  
42  
43  
44  
45  
46  
47  
48  
49  
50  
51  
52  
53  
54  
55  
56  
57  
58  
59  
60

For peer review only

## Introduction

The World Health Organization (WHO) identified sepsis as a high priority condition due to its incidence (~49 million cases/year), mortality (~11 million fatalities/year) and morbidity (cognitive decline at 5 years in up to half of survivors).<sup>1</sup> Dysregulated immune and endogenous cortisol responses to infection are hallmarks of sepsis, requiring prompt source control, anti-infective treatment, and cardiorespiratory management. Both overwhelming systemic inflammation and impaired endogenous cortisol response to infection are improved by the administration of corticosteroids.<sup>2</sup> Evidence from 61 trials accounting for 12,192 patients, including both children and adults with sepsis, suggested that corticosteroids saved 1 additional life every 33 treated patients.<sup>3</sup> There was no evidence of any difference in corticosteroids effects on survival between children and adults (Chi<sup>2</sup> = 0.29; df = 1; P = 0.62; I<sup>2</sup> = 0%), between uncomplicated sepsis, septic shock, ARDS, and CAP (Chi<sup>2</sup> = 7.60; df = 3; P = 0.06; I<sup>2</sup> = 60.5%). International guidelines (panel including consumers) recommended administrating corticosteroids in sepsis.<sup>4</sup> Likewise, the WHO recommended treatment with corticosteroids for COVID-19 patients requiring respiratory support, in keeping with results from the RECOVERY trial.<sup>5</sup> However, survival benefits of corticosteroids varied across trials highlighting the need to identify optimal target populations for corticosteroids.<sup>6-</sup>

<sup>9</sup> The effects of corticosteroids on survival from sepsis are independent of age, gender, disease severity, type or source of infection, or type of pathogen.<sup>3</sup> No reliable, routinely available diagnostic test predicts the response to corticosteroids in sepsis. Nevertheless, preliminary studies in adults<sup>10</sup> and children with sepsis<sup>11</sup> suggested that transcriptomic signatures may be associated with increased mortality in corticosteroids treated patients. Additionally, machine learning derived for individual prediction outperformed one size-fits-all decisions of hydrocortisone treatment in



1  
2  
3 septic shock.<sup>12</sup> Theoretically, survival benefits related to the administration of corticosteroids  
4  
5 require (i) hyperinflammation in response to an infection and (ii) intact cellular mechanisms  
6  
7 enabling corticosteroid bioactivity.<sup>2</sup> Both hyperinflammation and cellular mechanisms enabling  
8  
9 corticosteroid bioactivity are potential biomarkers of corticosteroid sensibility or resistance.

10  
11 The RECORDS trial aims at identifying biomarkers defining sepsis populations who may either  
12  
13 benefit or be harmed by corticotherapy. Biomarkers assessed in this trial are selected through  
14  
15 analysis of biological and clinical data previously obtained<sup>17</sup> and from the observational period of  
16  
17 the current trial.  
18  
19  
20  
21  
22

## 23 24 **Methods and analysis**

### 25 26 27 28 *Study design and oversight*

29  
30  
31  
32  
33 The study is divided into two distinctive stages, e.g. a run-in prospective observational cohort  
34  
35 followed by a biomarker-guided adaptive randomized controlled trial. As per request from the  
36  
37 French National Agency for Drug Safety, randomization is first stratified by SARS-CoV-2 status  
38  
39 (see figure 1). Patients tested positive for SARS-CoV-2 patients are randomized in a one-step  
40  
41 process to receive either dexamethasone and fludrocortisone or dexamethasone and  
42  
43 fludrocortisone placebo. Patients tested negative for SARS-CoV-2 patients are randomly assigned  
44  
45 to a biomarker/signature and then randomized for hydrocortisone (HC) and fludrocortisone (FC)  
46  
47 or their respective placebos. Patients positive to influenza or other respiratory viruses are not  
48  
49 mandatorily assigned to the arms corresponding to their infections (Influenza (+) or other  
50  
51  
52  
53  
54  
55  
56  
57  
58  
59  
60

1  
2  
3 respiratory viruses (+)) as they are randomly assigned to any biomarker/signature arms of the two-  
4  
5 step randomization (see figure 1).  
6  
7  
8  
9

10 The protocol and qualification of all investigators were approved by the Ethics Committee (*Comité*  
11 *de Protection des Personnes*, CPP Dijon, France), on April 6, 2020 and by the French National  
12 Agency for Drug Safety (ANSM, France) on April 9, 2020. Inclusion in the observational part of  
13  
14 the trial started on April 10, 2020 in 19 centers in France. The interventional part of the trial started  
15  
16 on June 10, 2021, in 20 centers nationwide. Recruitment is expected to be completed by December  
17  
18 2024.  
19  
20  
21  
22

23 Informed written consent of the patient is to be obtained prior to any act relating to the study.  
24  
25 Whenever the patients are unable to consent themselves, consent of a legally authorized  
26  
27 representative is sought (France, art. L 1122-1 CSP). The ethics committee allowed for deferred  
28  
29 consent when no legally authorized representative is available.  
30  
31  
32

33 A data safety and monitoring board (DSMB) including experts in intensive care and in infectious  
34  
35 diseases, was set up before recruitment of the first patient. DSMB members have full access to the  
36  
37 raw data of the trial and meet on a regular basis.  
38  
39

40 Data monitoring is performed by the sponsor (Assistance Publique-Hôpitaux de Paris *AP-HP*,  
41 *Paris Ile-de-France Ouest Clinical Trial Unit*, *URC HUPIFO*). The sponsor has full access to  
42  
43 patients' charts and checks for accuracy all data recorded onto the electronic case report form  
44  
45 (eCRF). Data management is performed by the sponsor.  
46  
47  
48

49 The Biological Resource Centre of the Raymond Poincaré Hospital (APHP), provides centers with  
50  
51 sample kits for biomarker measurements, collects and stores samples obtained from centers.  
52  
53  
54  
55  
56  
57  
58  
59

1  
2  
3 A central pharmacy (Agence Générale des Equipements et Produits de Santé, AGEPS) labels study  
4 drugs and ships them to participating centers. Unused drugs are destroyed by local pharmacist.  
5

6  
7 The trial is registered at ClinicalTrials.gov under number NCT04280497.  
8  
9

10 Data access: trial's investigators will have access to all trial's data and will vouch for the integrity  
11 of the data. Data will be shared within 6 months of the publication of the results of the primary  
12 analysis after trial completion. To access data third party will have to sign with the trial sponsor a  
13 data sharing agreement.  
14  
15  
16  
17  
18  
19  
20

### 21 ***Study Participants: recruitment strategy, inclusion and exclusion criteria, conduct of the trial***

22  
23  
24  
25

#### 26 Inclusion criteria

27

28 ICU patients aged  $\geq 18$  years will be eligible for inclusion into the trial if they meet all of the  
29 following criteria: 1) proven or suspected infection as the main diagnosis, 2) Community Acquired  
30 Pneumonia (CAP) related sepsis, or vasopressor-dependent sepsis, or septic shock<sup>13</sup> or Acute  
31 Respiratory Distress Syndrome (ARDS)<sup>14</sup>, 3) tested for one or more trial-specific biomarkers (see  
32 figure 1), 4) affiliated to the French social security or benefiting from universal health coverage.  
33  
34  
35  
36  
37  
38  
39  
40 Patients under guardianship or curatorship may be included.  
41  
42  
43

#### 44 Exclusion criteria

45

46  
47 Patients will not be eligible for the trial if they meet at least one of the following criteria: 1)  
48 expected death or withdrawal of life-sustaining treatments within 48 hours, 2) previously enrolled  
49 in the study, 3) formal indication for corticosteroids according to most recent international  
50 guidelines, 4) vaccination with live virus within the past 6 months, 5) hypersensitivity to  
51  
52  
53  
54  
55  
56  
57  
58  
59  
60

1  
2  
3 hydrocortisone or fludrocortisone or (microsined betamethasone dipropionate) or any of their  
4 excipients (SPC), 6) pregnancy, women of childbearing potential not using contraception, 7)  
5  
6 nursing women.  
7  
8  
9

## 10 11 12 ***Study measurements and procedures (table 1)*** 13

### 14 Screening visit

15  
16 After obtaining consent, the screening visit is performed in order to confirm inclusion and  
17 exclusion criteria and collect 1) patient demographics, 2) characteristics of infection, 3) severity  
18 of illness (SAPS II and SOFA score), 4) pre-existing comorbidities as defined by the Charlson  
19 comorbidity index, Clinical Frailty Scale, 5) core temperature and vital signs, 6) central  
20 hemodynamic data, 7) standard laboratory data including serum and urinary electrolytes,  
21 creatinine, urea, cholesterol, triglycerides and glucose levels, arterial lactate levels, arterial oxygen  
22 tension, hemoglobin oxygen saturation, arterial pH, white blood cell count, hemoglobin and  
23 hematocrit levels, INR, platelet count, total bilirubin level, microbiology and virology, results of  
24 the ACTH test, 8) measurement of biomarkers (serum endocan, monocytes expression of  
25 glucocorticoid induced leucine zipper (GILZ) and of dual specificity protein phosphatase 1  
26 (DUSP-1), monocyte distribution width (MDW), and blood genomic, transcriptomic and  
27 metabolomic measurements, exhaled air metabolomic) 9) interventions including mechanical  
28 ventilation, renal replacement therapy, vasopressors, administration of open label corticosteroid,  
29 thiamine, vitamin C, other vitamins, nutrition, intravenous fluids, blood products, anticoagulants,  
30 sedatives, stress ulcer prophylaxis, and antimicrobials, 10) results of the skin vasoconstrictor  
31 response to glucocorticoids. The screening visit ends with the randomization of eligible patients  
32 within 24 hours of obtaining the results of intelligent algorithms and biomarkers.  
33  
34  
35  
36  
37  
38  
39  
40  
41  
42  
43  
44  
45  
46  
47  
48  
49  
50  
51  
52  
53  
54  
55

56 Table 1: Data collection and conduct of the trial  
57  
58  
59  
60

| Variables/Visits                                                                                                                                                                                                                                                         | Daily data until ICU discharge or 90 days (whichever occurs first) | Specific measures at day 1 & 7 | Last study visit (90- and 180-day data) |
|--------------------------------------------------------------------------------------------------------------------------------------------------------------------------------------------------------------------------------------------------------------------------|--------------------------------------------------------------------|--------------------------------|-----------------------------------------|
| Vital status                                                                                                                                                                                                                                                             | X                                                                  |                                | X                                       |
| Location (ICU/date of discharge), hospital ward/date of discharge, rehabilitation centre, long-term facility, home/date of discharge                                                                                                                                     |                                                                    |                                | X                                       |
| Protocol adherence (receipt of every IMP dose until treatment completion)                                                                                                                                                                                                | X                                                                  |                                | X                                       |
| Co-interventions (mechanical ventilation, renal replacement therapy, vasopressors, unblinded corticosteroids, thiamine, vitamin C, other vitamins, nutrition, intravenous fluids, blood products, anticoagulants, sedatives, stress ulcer prophylaxis, & antimicrobials) | X                                                                  |                                | X                                       |
| Core temperature (daily lowest & highest value)                                                                                                                                                                                                                          | X                                                                  |                                | X                                       |
| Vital signs (lowest & highest values for heart rate, systolic & diastolic blood pressure)                                                                                                                                                                                | X                                                                  |                                | X                                       |
| Central hemodynamic data                                                                                                                                                                                                                                                 | X                                                                  |                                |                                         |

|                                                                                                                                                                                                                                                                                                                            |   |   |   |
|----------------------------------------------------------------------------------------------------------------------------------------------------------------------------------------------------------------------------------------------------------------------------------------------------------------------------|---|---|---|
| Standard laboratory data (serum and urinary electrolytes, creatinine, urea, cholesterol, triglycerides & glucose levels, arterial lactate levels, arterial oxygen tension& hemoglobin oxygen saturation, arterial pH, white blood cell counts, hemoglobin & hematocrit levels, INR, platelet count, total bilirubin level) | X |   |   |
| Microbiological or virological samples                                                                                                                                                                                                                                                                                     |   | X |   |
| Other sampling left at the physicians' discretion                                                                                                                                                                                                                                                                          | X |   |   |
| Whole blood samples for measurements of biomarkers                                                                                                                                                                                                                                                                         |   | X |   |
| Glasgow coma scale                                                                                                                                                                                                                                                                                                         |   |   | X |
| Cognitive function                                                                                                                                                                                                                                                                                                         |   |   | X |
| Muscular Disability Rating Scale (MDRS) score                                                                                                                                                                                                                                                                              |   |   | X |
| Health-Related Quality of Life (HRQoL, EQ-5D-5L) <sup>20</sup>                                                                                                                                                                                                                                                             |   |   | X |
| PROMIS® (Fatigue 13a, Ability to participate in social roles and activities 8a, Physical function 8b, Emotional distress-Depression 8b, Emotional distress-Anxiety 8a, Cognitive function 8a)                                                                                                                              |   |   | X |

### Endotyping

Candidate biomarkers are selected from: 1) signatures described in the literature, 2) biomarkers identified from RECORDS data obtained in the observational period of the study and 3) any national and/or international guidelines (figure 2). At the onset of the trial, 13 biomarkers/signatures had been identified. In the COVID-19 stratum, patients will be randomized in a single step (figure 1) to receive dexamethasone 6mg per day for 10 days<sup>5</sup> combined with fludrocortisone or its placebo. The added value of a drug exhibiting a mineralocorticoid activity is worth evaluating in view of the role of the angiotensin-converting enzyme 2 receptor and endothelial dysfunction in the pathogenesis of COVID-19.<sup>15</sup> The Influenza virus and non-Influenza respiratory virus strata aim at filling the evidence gap related to the lack of randomized trial having assessed corticotherapy in viral pneumonia related sepsis.<sup>16</sup> The CIRCI (Critical Illness-Related Corticosteroid Insufficiency) stratum is defined by baseline total cortisol of 10µg/dL or less or a maximum increment in total cortisol of less than 9µg/dL at 30 and 60 minutes following a 250µg intravenous bolus of cosyntropin.<sup>17</sup> Endocan is an endothelial peptidoglycan that contributes to regulate inflammation by counteracting leukodiapedesis, a key target for corticosteroids.<sup>18</sup> We identified serum levels of endocan below 12.8ng/ml as a marker of hyperinflammation in the run-in period of RECORDS trial. The Monocyte Distribution Width (MDW) stratum is defined by MDW >25.<sup>19</sup> The lymphocytes count stratum is defined by lymphocyte count below  $870 \times 10^3$ /ml, according to a recent study suggesting that lymphopenia was associated with corticosteroids resistance.<sup>19</sup> The Transcriptomic Sepsis Response Signature (SRS) stratum is based on two distinct signatures suggesting immune suppression (SS1) and relative immune competency (SRS2).<sup>20</sup> Using generalized linear model based on a set of seven genes (DYRK2, CCNB1IP1, TDRD9, ZAP70, ARL14EP, MDC1, and ADGRE3), hydrocortisone may

1  
2  
3 be associated with increased mortality in SRS2 patients.<sup>10</sup> The endotype A/B stratum is based on  
4 transcriptomic analysis of 100 genes reflecting the adaptive immunity and glucocorticoid receptor  
5 signaling. In children with sepsis, two distinct endotypes were identified, endotype A characterized  
6 by immune suppression and a higher risk for mortality when compared to endotype B.<sup>21</sup> The  
7 Glucocorticoid-Induced Leucine Zipper (GILZ) and Dual Specificity Phosphatase 1 (DUSP-1)  
8 strata are defined by reduced expression of GILZ and DUSP-1 by unstimulated isolated circulating  
9 monocytes. GILZ<sup>22</sup> and DUSP-1 are key endogenous regulators of the immune response.  
10 Preliminary data from the observational period of RECORDS suggested an association between  
11 the spontaneous expression of GILZ and of DUSP-1 and increased mortality in serious COVID-  
12 19 (unpublished). The cutaneous vasoconstrictor response to glucocorticoids stratum is defined  
13 according to previous report in asthma.<sup>23</sup> Briefly, the test is performed by applying 30µg/ml  
14 betamethasone to the skin of the forearm. The degree of skin blanching is assessed after 12h of  
15 exposure with a score ranging from 0 to 4; 0 no skin blanching, 1 skin blanching is less than 50%  
16 of the area of application, 2 skin blanching is more than 50% of the area of application, 3 if  
17 blanching recovers the whole area of application, and 4 if blanching expands beyond the area of  
18 application. A score of 2 or less indicates resistance to corticosteroids. A photography of the  
19 forearm restricted to the tested skin area will be recorded. The intelligent algorithms strata include  
20 two algorithms one developed through machine learning<sup>12</sup> and another one using other machine  
21 learning modeling approaches (unpublished), both being embedded into the eCRF.  
22  
23  
24  
25  
26  
27  
28  
29  
30  
31  
32  
33  
34  
35  
36  
37  
38  
39  
40  
41  
42  
43  
44  
45  
46  
47  
48

### 49 Follow-up

50 All patients are followed-up at 3 and 6 months from randomization. The details of follow-up are  
51 given in table 1.  
52  
53  
54  
55  
56  
57  
58  
59  
60



1  
2  
3 Vital status by day 90 after randomization will be collected from the medical file and/or through  
4  
5 phone calls with patients or their legal representative.  
6  
7

### 8 9 10 ***Outcomes***

11  
12 The primary outcome assessed at 90 days, is a composite of death or persistent organ dysfunction  
13  
14 – defined as SOFA score >6 and a continued dependency on either mechanical ventilation, new  
15 renal replacement therapy, or vasopressors.<sup>8,24</sup> The primary endpoint is a binary variable. Patients  
16  
17 will be classified as a success if they are alive on day 90 and free of vasopressor therapy,  
18  
19 mechanical ventilation, renal replacement therapy, and organ dysfunction. Patients will be  
20  
21 classified as a failure if they either died within 90 days of randomization or if they remained  
22  
23 dependent on either vasopressor, mechanical ventilation, RRT, or exhibited a SOFA score >6.  
24  
25  
26  
27  
28  
29  
30

31 Secondary outcomes include: 1) Mortality at 7, 14 and 28 days and 6 months; 2) Vasopressor free  
32  
33 days: defined as the number of days with permanent hemodynamic stability in the absence of any  
34  
35 vasopressor agent including norepinephrine, phenylephrine, epinephrine, dopamine, vasopressin  
36  
37 or its analogs. When a patient dies while receiving vasopressors, the number of vasopressor free  
38  
39 days is arbitrarily set at 0; 3) Mechanical ventilation free days: defined as the number of days with  
40  
41 permanent appropriate oxygenation while the patient is extubated and breathing spontaneously,  
42  
43 i.e. no need for non-invasive ventilation, high flow oxygen or continuous positive airway pressure  
44  
45 (CPAP). Other uses of non-invasive ventilation (e.g., chronic night-time use for chronic  
46  
47 obstructive pulmonary disease) are not compatibilized. When a patient dies while receiving  
48  
49 mechanical ventilation or is discharged home while receiving mechanical ventilation, the number  
50  
51 of mechanical ventilation free days is arbitrarily set at 0; 4) Organ dysfunction free days: Organ  
52  
53  
54  
55  
56  
57  
58  
59  
60

1  
2  
3 function (including renal function) will be assessed using the SOFA score.<sup>25</sup> Organ dysfunction  
4 will be defined by a SOFA score > 6.<sup>8</sup> Organ dysfunction free days is defined by the number of  
5 days with a total SOFA score of 6 or less. When a patient dies before the SOFA decreased to 6 or  
6 less, the number of organ dysfunction free days is arbitrarily set at 0; 5) 6-month HRQoL in  
7 survivors assessed using the EQ-5D-5L.<sup>26</sup> This standardised questionnaire was developed to  
8 provide a simple, generic measure of health for clinical and economic appraisal. It is made up of  
9 two components: health status description and health status self-assessment. Health status is  
10 assessed using five dimensions; mobility, self-care, usual activities, pain/discomfort, and  
11 anxiety/depression. Health status self-assessment reports on patients overall health status using a  
12 visual analogue scale; 6) Fatigue, ability to partake in social activities, physical function, emotional  
13 distress, depression, anxiety and cognitive function are assessed using the PROMIS short form  
14 questionnaire 7) Proportion of patients with a decision to withhold and/or withdraw active  
15 treatments; 8) ICU and hospital length of stay; 9) Rate of ICU re-admission up to 180 days after  
16 randomization.

17  
18  
19 Safety endpoints include: proportion of patients affected by any serious adverse event associated  
20 with corticosteroids, 1) hospital-acquired infection (CDC. Healthcare-Associated Infections  
21 (HAIs) progress report. 2020) within 90 days of randomization, 2) hyperglycemia (blood glucose  
22 level >150mg/dl) and hypernatremia (serum sodium > 145 mmol/L) during the ICU stay (or up to  
23 day 90, whichever occurs first), 3) Gastroduodenal bleeding requiring transfusion or hemostatic  
24 treatment during the ICU stay (or up to day 90, whichever occurs first), 4) neurological disorder  
25 (coma, stroke or muscle weakness, as defined below) up to 180 days from randomization. Coma  
26 is defined by a Glasgow coma score <8 in the absence of sedation. Neuromuscular sequelae are  
27  
28  
29  
30  
31  
32  
33  
34  
35  
36  
37  
38  
39  
40  
41  
42  
43  
44  
45  
46  
47  
48  
49  
50  
51  
52  
53  
54  
55  
56  
57  
58  
59  
60

1  
2  
3 assessed using the Muscular Disability Rating Scale (MDRS), with a score of 1 indicating no  
4 deficit, 2 minor deficit with no functional disability, 3 distal motor deficit, 4 mild-to-moderate  
5 proximal motor deficit, and 5 severe proximal motor deficit.  
6  
7  
8  
9  
10

## 11 ***Randomization***

### 12 Timing of randomization

13  
14  
15  
16  
17 The period from inclusion to randomization, including the period of laboratory testing for  
18 biomarkers, should not exceed 24 hours.  
19

### 20 Generation of the randomization list

21  
22 A computer process is used to generate allocation sequences in a 1:1 ratio, independently from  
23 Healthcare staff, research personnel, ICU personnel, participants, members of the Executive and  
24 Steering Committees, or the data analyst.  
25  
26  
27  
28  
29

### 30 Allocation concealment

31  
32  
33 Randomization will be concealed by being centralized and performed with an internet-centralized  
34 service running 24/7 imbedded in the electronic Case Report Form (eCRF). Healthcare staff,  
35 research personnel, ICU personnel, participants, members of the Executive and Steering  
36 Committees, and the data analyst will be blinded to treatment allocation. Only the central  
37 pharmacist, from the General Agency of Equipment and Health Products (AGEPS – APHP) will  
38 be unblinded.  
39  
40  
41  
42  
43  
44  
45  
46  
47  
48

### 49 Allocation of stratification

50  
51 Stratification is randomly performed amongst all assessed biomarkers for each patient. The  
52 randomization algorithm runs separately while communicating with the eCRF. Data related to  
53  
54  
55  
56  
57  
58  
59  
60

1  
2  
3 biomarker results, virology results and input required for determining intelligent algorithm are sent  
4 to the randomization algorithm. The result of a single biomarker is sufficient to run the  
5 randomization algorithm. Within the randomly selected biomarker strata, the randomization  
6 algorithm then determines the assigned treatment arm: hydrocortisone and fludrocortisone versus  
7 their respective placebos. COVID-19 patients are all treated with dexamethasone and randomly  
8 assigned to receive fludrocortisone or its placebo.  
9  
10  
11  
12  
13  
14  
15  
16  
17  
18  
19  
20  
21

## 22 ***Interventions***

### 23 Experimental treatments

24 Investigational medicinal products are presented in numbered boxes, labelled for this study  
25 according to the Good Manufacturing Practices under the responsibility of AGEPS. Each  
26 numbered box contains enough corticosteroids or placebo to fully treat one patient. A drug box  
27 contains 30 vials of hydrocortisone 100mg or placebo and 1 blister of 10 tablets of fludrocortisone  
28 50µg or placebo.  
29  
30  
31  
32  
33  
34  
35  
36

37 Hydrocortisone hemisuccinate (SERB, Paris) or its placebo is administered as a 50mg intravenous  
38 bolus every 6 hours for seven days. Fludrocortisone or its placebo (HAC Pharma, Caen) is  
39 administered as a 50µg tablet via a nasogastric tube once a day in the morning, for seven days.  
40  
41  
42  
43  
44

45 COVID-19 patients are to be treated with open label dexamethasone (6mg) once a day over 10  
46 days and 50µg fludrocortisone or its placebo (HAC Pharma, Caen) via a nasogastric tube, once a  
47 day in the morning, for seven days.  
48  
49  
50  
51  
52  
53

### 54 Allowed co-interventions

55  
56  
57  
58  
59  
60

1  
2  
3 Treatments are allowed according to best practice guidelines.<sup>27</sup> These treatments may include,  
4 mechanical ventilation, renal replacement therapy, vasopressor therapy, thiamine, nutrition  
5  
6 therapies including multivitamins, intravenous fluids, blood products, sedatives, and  
7  
8 antimicrobials. We will carefully record the use of these treatments.  
9

### 10 11 12 13 14 Forbidden interventions

15  
16 Hydrocortisone and other corticosteroids whatever the dose and the route (except local  
17 administration, nebulization not being considered as a local administration) are not allowed, except  
18  
19 dexamethasone 6mg per day for 10 days in patients with COVID-19. If an unavoidable indication  
20  
21 occurs after randomization (e.g. autoimmune disease), the patient should be treated. In this case,  
22  
23 study treatments are to be suspended to avoid the administration of unnecessarily high-dose of  
24  
25 hydrocortisone. However, short-duration administration of open-labelled corticosteroids is  
26  
27 allowed for prevention of post-extubation laryngeal edema.  
28  
29

30  
31  
32 Continuous infusion of neuromuscular blocking agents is to be avoided. Whenever neuromuscular  
33  
34 blocking drugs are mandatory (e.g. for severe ARDS), it should be interrupted every 12 hours to  
35  
36 avoid prolonging the treatment longer than necessary.  
37  
38  
39  
40  
41

### 42 ***Statistical analysis***

43  
44 A full statistical analysis plan will be reported in a separate paper.  
45  
46

### 47 Sample size

48  
49 Sequential analyses will use the number of vasopressor-free days at day 28 as the measure of  
50  
51 efficacy, and the occurrence of severe adverse events within the first 28 days as the measure of  
52  
53 toxicity. In a recent study,<sup>8</sup> the number of vasopressor-free days at day 28 with  
54  
55  
56  
57  
58  
59

1  
2  
3 hydrocortisone+fludrocortisone was  $17.1 \pm 10.8$  versus  $15.0 \pm 11.1$  in placebos. Thus, a sample of  
4  
5  $176 \times 2 = 352$  patients achieves 80.04 % power to reject the null hypothesis of equal means when the  
6  
7 mean difference between arms is 3 days with SD of 10 days, and with a significant level (alpha)  
8  
9 of 0.05 using a two-sample t-test. For interactions to be detected with the same power as the overall  
10  
11 effect, sample sizes should be inflated<sup>28</sup>; estimated here at a multiple of fourfold; therefore, to  
12  
13 handle potential dropouts, a sample was estimated at 1800 patients. Bayesian inference will be  
14  
15 used for sequential analyses.  
16  
17

18  
19 To detect a 10% absolute risk reduction from 45% to 35% in 90-day all-cause mortality,<sup>8</sup> a sample  
20  
21 size of 373 evaluable patients per arm (thus a total of 746 patients) is required to reach 80% power.  
22  
23

24 The planned sample of 1800 patients will achieve a 99.16% power to reject the null hypothesis of  
25  
26 equal mortality when the difference between arms is 10% overall, and with a 5% alpha level.  
27  
28

29 Sample sizes were computed using PASS 15 software (2017).

30  
31 The power to detect this difference within each group of analysis will depend on the prevalence of  
32  
33 each biomarker of interest.  
34  
35

### 36 37 38 Performance of the Bayesian design

39  
40 To restrict inclusion to patients most likely to benefit from corticosteroids during trial accrual, an  
41  
42 enrichment design will be used, based on treatment-by-subset interaction. Two main objectives  
43  
44 will be considered: (1) To estimate corticosteroid marginal effect; and (2) To test for heterogeneity  
45  
46 across subsets. We previously reported that this strategy successfully selected patients sensitive to  
47  
48 treatment and discarded the less sensitive ones.<sup>29</sup> Performance of design will be challenged using  
49  
50 a large simulation study performed across a range of plausible scenarios to foresee power to detect  
51  
52  
53  
54  
55  
56  
57  
58  
59  
60

1  
2  
3 a 5-10% absolute difference with corticosteroids, considering a fixed sample size of 1800 patients,  
4  
5 several sizes of each subset, under several scenarios of treatment effect and interaction.  
6  
7  
8  
9

### 10 Data analysis

11 All patients, whatever their biomarker status will be randomized across the two treatment groups.  
12  
13 Statistical analysis will be conducted using “biomarker-by-treatment interaction” with separate  
14  
15 tests, given the high number of potential biomarkers of interest. This is also referred to as “separate  
16  
17 randomization designs” and “separate by treatment interaction designs”. The analysis plan will be  
18  
19 based on separate estimation of corticosteroid effect in each biomarker-defined subgroup to detect  
20  
21 treatment by subgroup interactions. It will determine whether corticosteroid effect differs  
22  
23 according to each biomarker, assessed through an interaction measure. We will assess subset-by-  
24  
25 treatment interaction by estimating two quantities: (i) measure of influence (efficacy), relying on  
26  
27 the value of the estimation of corticosteroids effect in each subset, and (ii) measure of interaction  
28  
29 (based on the ratio of the estimated effect in both subsets).<sup>30</sup> In a Bayesian setting, the two criteria  
30  
31 can be expressed as posterior probabilities related to the comparison of outcomes across the arms  
32  
33 and/or the subsets. This analysis will be performed only for biomarkers with at least 100 available  
34  
35 measures.  
36  
37  
38  
39  
40  
41  
42  
43  
44

### 45 ***Role of funding source***

46 The sponsor has no role in study design; in the collection, analysis, and interpretation of data; in  
47  
48 the writing of the report; and in the decision to submit the paper for publication  
49  
50  
51  
52  
53

### 54 ***Ethics and dissemination***

1  
2  
3 RECORDS is funded by public grants “Programme d’Investissements d’Avenir” (PIA), reference  
4 ANR-18-RHUS-0004 and Programme Hospitalier de Recherche Clinique (PHRC), reference  
5 PHRC-20-0778. The protocol was approved by the Ethics Committee (*Comité de Protection des*  
6 *Personnes*, CPP Dijon, France), on April 6, 2020 and by the French National Agency for Drug  
7 Safety (ANSM, France) on April 9, 2020. Trial results will be disseminated at relevant clinical  
8 conferences and societies, published in peer-reviewed journals  
9  
10  
11  
12  
13  
14  
15  
16  
17  
18

### 19 ***Patients and Public Involvement***

20  
21 The trial protocol will be discussed with France Sepsis Association (an association of patients who recover  
22 from sepsis and families of patients who had sepsis) and trial findings will be shared with this entity.  
23  
24  
25  
26  
27

### 28 **Discussion**

29  
30  
31  
32  
33 RECORDS is the first multicenter, placebo-controlled, biomarker-guided, adaptive Bayesian  
34 design Basket trial aimed at discovering signatures enabling administration of hydrocortisone plus  
35 fludrocortisone in patients with sepsis and determining the best chance for improved outcome with  
36 minimal risk of harm. RECORDS trial relies on the concept that benefit to risk balance of  
37 corticosteroids is greater when given to patients with sepsis and evidence of hyperinflammation  
38 and intact corticosteroids related intracellular signaling. The RECORDS trial also hypothesizes  
39 that different clinical phenotypes of sepsis, i.e. CAP related sepsis, septic shock, or sepsis related  
40 ARDS, bacterial or viral sepsis, may share common signatures relevant to corticosteroids  
41 responsiveness. The study design is highly innovative integrating a broad range of candidate  
42 biomarkers from multi-omics signatures to intelligent algorithms. Candidate biomarkers are to be  
43  
44  
45  
46  
47  
48  
49  
50  
51  
52  
53  
54  
55  
56  
57  
58  
59  
60



1  
2  
3 selected from various sources including peer-reviewed literature and from our own consortium,  
4  
5 thanks to the translational research program embedded into the RECORDS trial. The adaptive  
6  
7 design of the study is a clear strength insomuch as unsatisfying biomarkers may rapidly be phased  
8  
9 out and new biomarkers may be phased in. All assessed biomarkers must provide readily available  
10  
11 results within 24 hours, meaning that the findings of the current trial will be easily translated into  
12  
13 clinical practice. We must acknowledge some limits to the current trial including the fact that some  
14  
15 complex biomarkers may not be available at all participating centers.  
16  
17

18  
19 RECORDS trial is a major step in the implementation of precision medicine in sepsis. Indeed,  
20  
21 personalized corticosteroid treatments for sepsis, may decrease the burden related to  
22  
23 corticosteroids complications by avoiding exposure of patients unlikely to respond to this  
24  
25 treatment.  
26  
27

### 28 29 30 **Authors' contributions:**

31  
32 All authors contributed to drafting the work, revising it critically for important intellectual content  
33  
34 and approved the final version of the manuscript. All authors gave their agreement to be  
35  
36 accountable for all aspects of the work, and ensure the accuracy and integrity of any part of it.  
37  
38  
39  
40  
41

42 **Declaration of interest:** all authors declare to have no conflict of interest to disclose  
43  
44  
45

46  
47 **Funding:** RECORDS is funded by public grants “Programme d’Investissements d’Avenir”  
48  
49 (PIA), reference ANR-18-RHUS-0004 and French ministry of health Programme Hospitalier de  
50  
51 Recherche Clinique (PHRC), contract number PHRC-20-0778.  
52  
53  
54  
55  
56  
57  
58  
59  
60

## References

1. [https://www.who.int/health-topics/sepsis#tab=tab\\_1](https://www.who.int/health-topics/sepsis#tab=tab_1)
2. Heming et al. Immune effects of corticosteroids in sepsis. *Front Immunol.* 2018, 9: 1736.
3. Annane et al. Corticosteroids for treating sepsis in children and adults. *Cochr. Data. Sys. Rev.* 2019; 12(12): CD002243.
4. Lamontagne. Corticosteroid therapy for sepsis: a clinical practice guideline. *BMJ.* 2018; 362.
5. Horbi et al. Dexamethsone in hospitalized patients with COVID-19. *NEJM.* 2021; 384.
6. Annane et al. Effect of treatment with low doses of hydrocortisone and fludrocortisone on mortality in patients with septic shock. *JAMA.* 2002; 288:862.
7. Sprung et al. Hydrocortisone therapy for patients with septic shock. *NEJM.* 2008; 358: 111.
8. Annane et al. Hydrocortisone plus fludrocortisone for adults with septic shock. *NEJM* 2018; 378.
9. Venkatesh et al. Adjunctive glucocorticoid therapy in patients with septic shock. *NEJM* 2018; 378: 797.
10. Anteliffe et al. Transcriptomic signatures in sepsis and a differential response to steroids. From the VANISH randomized trial. *AJRCCM.* 2019, 199:7.
11. Wong et al. Developing a clinically feasible personalized medicine approach to pediatric septic shock. *AJRCCM* 2015; 191:309.
12. Pirracchio et al. Assessment of machine learning to estimate the individual treatment effect of corticosteroids in septic shock. *JAMA Netw Open,* 3(12): e2029050, 2020.
13. Singer et al. The third international consensus definitions for sepsis and septic shock (sepsis-3). *JAMA.* 2016, 315(8): 801-810.
14. Ranieri et al. Acute respiratory distress syndrome : the Berlin definition. ARDS Definition Task Force. *JAMA.* 2012, 307: 2526-2533.
15. Gupta, A., Madhavan, M.V., Sehgal, K. *et al.* Extrapulmonary manifestations of COVID-19. *Nat Med* 26, 1017–1032 (2020).

- 1  
2  
3 16. Lansbury L, Rodrigo C, Leonardi-Bee J, Nguyen-Van-Tam J, Lim WS. Corticosteroids as  
4  
5 adjunctive therapy in the treatment of influenza. *Cochrane Database Syst Rev.* 2019 Feb  
6  
7 24;2(2):CD010406. doi: 10.1002/14651858.CD010406.pub3.  
8
- 9  
10 17. Annane et al. Guidelines for the diagnosis and management of critical illness-related corticosteroid  
11  
12 insufficiency (CIRCI) in critically ill patients (Part I): Society for Critical Care Medicine (SCCM)  
13  
14 and European Society of Intensive Care Medicine (ESICM). 2017. *Intens. Care Med.* 2017; 43(12):  
15  
16 1751-1763.  
17
- 18 18. Gaudet et al. Low endocan levels are predictive of Acute Respiratory Distress Syndrome in severe  
19  
20 sepsis and septic shock. *J Crit Care.* 2018; 47: 121-126.  
21
- 22 19. Annane et al. Monocyte distribution width as a biomarker of resistance to corticosteroids in patients  
23  
24 with sepsis: the MOCORSEP observational study. *Intens. Care Med.* 2021; 47: 1161-1164.  
25
- 26 20. Davenport et al. Genomic landscape of the individual host response and outcomes in sepsis: a  
27  
28 prospective cohort study. *Lancet Resp. Med.* 2016; 4: 259-271.  
29
- 30 21. Wong et al. Endotype transitions during the acute phase of pediatric septic shock reflect changing  
31  
32 risk and response. *Crit Care Med.* 2018; 46(3): e242-e249.  
33
- 34 22. Ellouze et al. Overexpression of GILZ in macrophages limits systematic inflammation while  
35  
36 increasing bacterial clearance in sepsis. *Eur J Immunol.* 2020. 50(4): 589-602.  
37
- 38 23. Brown et al. Cutaneous vasoconstrictor response to glucocorticoids in asthma. *Lancet.* 1991.  
39  
40 337(8741): 576-580  
41  
42
- 43 24. Laterre et al. Effect of selepressin vs placebo on ventilator- and vasopressor-free days in patients  
44  
45 with septic shock: the SEPSIS-ACT randomized clinical trial. *JAMA.* 2019; 322(15): 1476-1485.  
46
- 47 25. Vincent et al. The SOFA (Sepsis-related Organ Failure Assessment) score to describe organ  
48  
49 dysfunction/failure. On behalf of the Working Group on sepsis-related problems of the European  
50  
51 society of intensive care medicine. *Intens Care Med.* 22(7): 707-710.  
52
- 53 26. Herdman et al. Development and preliminary testing of the new five-level version of EQ-5D (EQ-  
54  
55 5D-5L). *Quality of Life Res.* 2011; 20: 1727-1736.  
56  
57  
58  
59

- 1  
2  
3 27. Evans L, et al. Surviving sepsis campaign: international guidelines for management of sepsis and  
4 septic shock 2021. *Intensive Care Med.* 2021 Nov;47(11):1181-1247.  
5  
6  
7 28. Brookes ST, Whitely E, Egger M, Smith GD, Mulheran PA, Peters TJ. Subgroup analyses in  
8 randomized trials: risks of subgroup-specific analyses; power and sample size for the interaction  
9 test. *J Clin Epidemiol.* 2004;57(3):229-36.  
10  
11  
12 29. Vinnat & Chevret. Enrichment Bayesian design for randomized clinical trials using categorical  
13 biomarkers and a binary outcome. *BMC Med Res Method.* 22(1): 54.  
14  
15  
16 30. Millen et al. Bayesian assessment of the influence and interaction conditions in multipopulation  
17 tailoring clinical trials. *J Biopharm Stat.* 24(1): 94-109.  
18  
19  
20  
21  
22  
23  
24  
25  
26  
27  
28  
29  
30  
31  
32  
33  
34  
35  
36  
37  
38  
39  
40  
41  
42  
43  
44  
45  
46  
47  
48  
49  
50  
51  
52  
53  
54  
55  
56  
57  
58  
59  
60

1  
2  
3  
4  
5  
6  
7  
8  
9  
10  
11  
12  
13  
14  
15  
16  
17  
18  
19  
20  
21  
22  
23  
24  
25  
26  
27  
28  
29  
30  
31  
32  
33  
34  
35  
36  
37  
38  
39  
40  
41  
42  
43  
44  
45  
46  
47  
48  
49  
50  
51  
52  
53  
54  
55  
56  
57  
58  
59  
60

For peer review only

1  
2  
3 Legends for figures  
4

5 **Figure 1. Study flow chart describing the process of recruitment and randomization.**

6  
7 Artificial Intelligence (AI), Critical Illness-Related Corticosteroid Insufficiency (CIRCI), Dual Specificity  
8 Phosphatase 1 (DUSP-1), Fludrocortisone (FC), Glucocorticoid-Induced Leucine Zipper (GILZ),  
9  
10 Hydrocortisone (HC), Monocyte Distribution Width (MDW), Respiratory (Resp.), Sepsis Response  
11  
12  
13  
14 Signature (SRS).  
15

16 **Figure 2. Flow diagram describing the potential addition and subsequent validation of biomarkers**  
17 **during the trial**  
18  
19  
20  
21  
22  
23  
24  
25  
26  
27  
28  
29  
30  
31  
32  
33  
34  
35  
36  
37  
38  
39  
40  
41  
42  
43  
44  
45  
46  
47  
48  
49  
50  
51  
52  
53  
54  
55  
56  
57  
58  
59  
60

Figure 1 Study flow chart describing the process of recruitment and randomization.

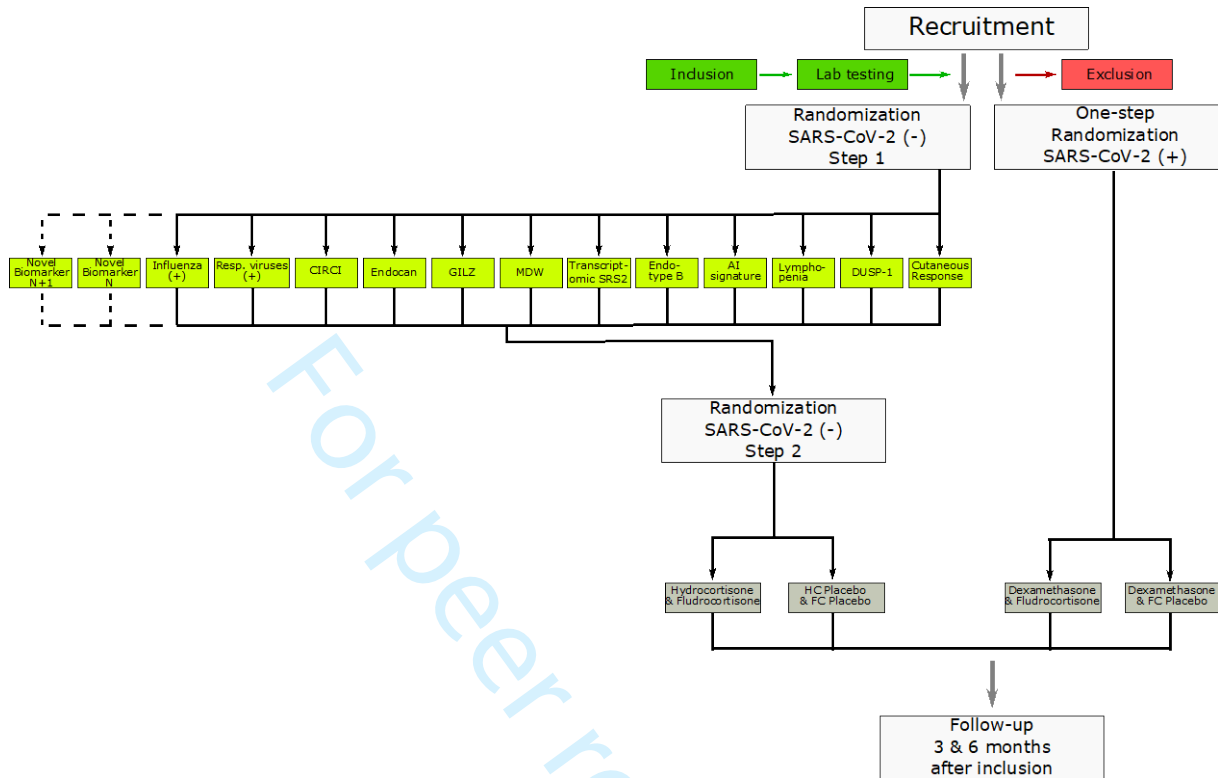

For peer review only

**Figure 2 Flow diagram describing the potential addition and subsequent validation of biomarkers during the trial**

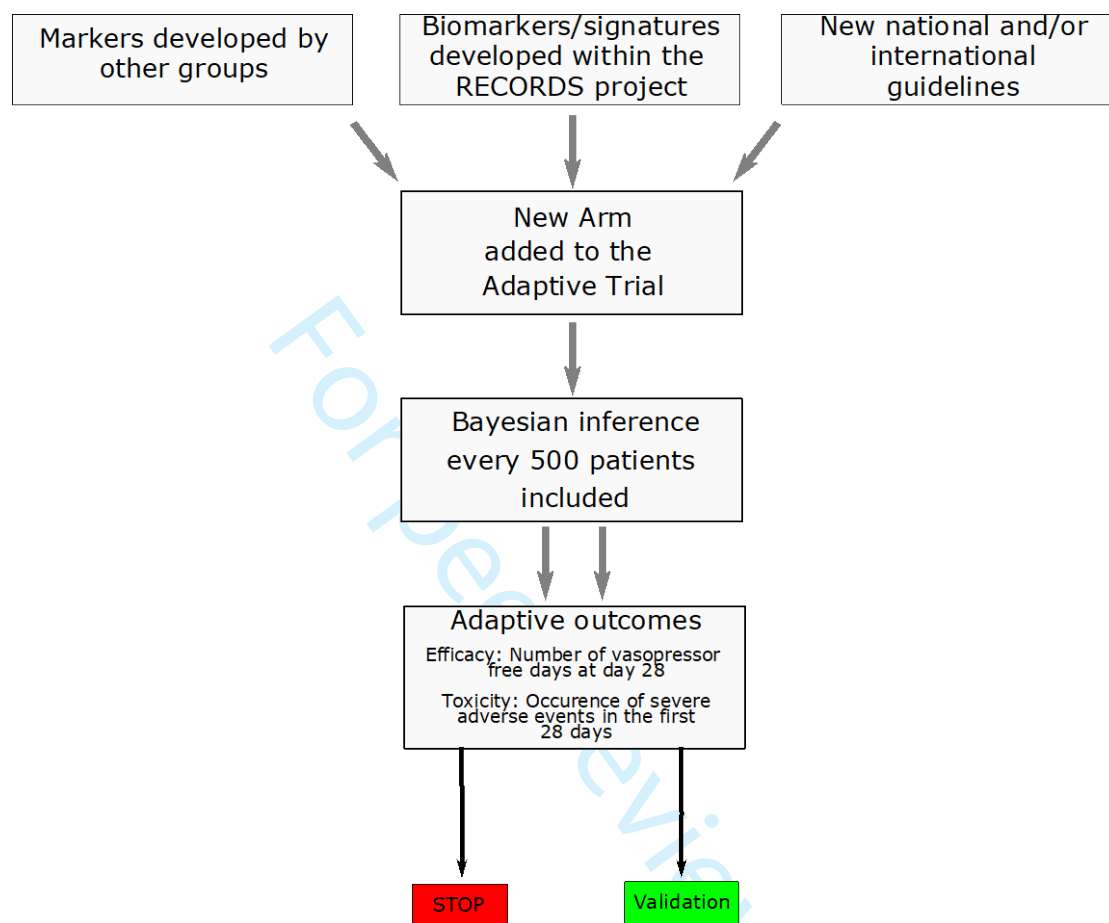



# BMJ Open

## Rapid rEcognition of CORTicosteRoiD resistant or sensitive Sepsis (RECORDS): study protocol for a Multicenter, placebo-controlled, biomarker-guided, adaptive Bayesian design Basket trial.

|                               |                                                                                                                                                                                                                                                                                                                                                                                                                                                                                                                                                                                                                                                                                                                                                                                                                                                                                                                                                                                                                                                                                                                                                                                                                                                                                                                                                                                                                                                                                                                                                                                                                                                                                                                                                                                                                                                                                                                                                                                                                                                                                    |
|-------------------------------|------------------------------------------------------------------------------------------------------------------------------------------------------------------------------------------------------------------------------------------------------------------------------------------------------------------------------------------------------------------------------------------------------------------------------------------------------------------------------------------------------------------------------------------------------------------------------------------------------------------------------------------------------------------------------------------------------------------------------------------------------------------------------------------------------------------------------------------------------------------------------------------------------------------------------------------------------------------------------------------------------------------------------------------------------------------------------------------------------------------------------------------------------------------------------------------------------------------------------------------------------------------------------------------------------------------------------------------------------------------------------------------------------------------------------------------------------------------------------------------------------------------------------------------------------------------------------------------------------------------------------------------------------------------------------------------------------------------------------------------------------------------------------------------------------------------------------------------------------------------------------------------------------------------------------------------------------------------------------------------------------------------------------------------------------------------------------------|
| Journal:                      | <i>BMJ Open</i>                                                                                                                                                                                                                                                                                                                                                                                                                                                                                                                                                                                                                                                                                                                                                                                                                                                                                                                                                                                                                                                                                                                                                                                                                                                                                                                                                                                                                                                                                                                                                                                                                                                                                                                                                                                                                                                                                                                                                                                                                                                                    |
| Manuscript ID                 | bmjopen-2022-066496.R1                                                                                                                                                                                                                                                                                                                                                                                                                                                                                                                                                                                                                                                                                                                                                                                                                                                                                                                                                                                                                                                                                                                                                                                                                                                                                                                                                                                                                                                                                                                                                                                                                                                                                                                                                                                                                                                                                                                                                                                                                                                             |
| Article Type:                 | Protocol                                                                                                                                                                                                                                                                                                                                                                                                                                                                                                                                                                                                                                                                                                                                                                                                                                                                                                                                                                                                                                                                                                                                                                                                                                                                                                                                                                                                                                                                                                                                                                                                                                                                                                                                                                                                                                                                                                                                                                                                                                                                           |
| Date Submitted by the Author: | 16-Feb-2023                                                                                                                                                                                                                                                                                                                                                                                                                                                                                                                                                                                                                                                                                                                                                                                                                                                                                                                                                                                                                                                                                                                                                                                                                                                                                                                                                                                                                                                                                                                                                                                                                                                                                                                                                                                                                                                                                                                                                                                                                                                                        |
| Complete List of Authors:     | <p>Fleuriet, Jérôme; APHP University Versailles Saint Quentin - University Paris Saclay, Department of Intensive Care<br/> heming, nicholas; Hopital Raymond-Poincare, General intensive care unit<br/> MEZIANI, Ferhat; Nouvel Hôpital Civil<br/> Reignier, Jean; CHU Nantes, Médecine intensive réanimation<br/> Declercq, Pierre-Louis; hopital de Dieppe, Service de Médecine Intensive Réanimation<br/> Mercier, Emmanuelle; University Hospital Centr, Medical Intensive Care<br/> Muller, Grégoire; Centre Hospitalier Régional d'Orleans, Médecine Intensive Réanimation<br/> Colin, Gwenhaël ; Centre Hospitalier Départemental de Vendée, Service de Médecine Intensive et Réanimation<br/> Monnet, Xavier; AP-HP, Service de Médecine Intensive-Réanimation, Hôpital de Bicêtre, DMU4 CORREVE Maladies du Cœur et des Vaisseaux<br/> Robine, Adrien; Centre Hospitalier de Bourg-en-Bresse-Fleyriat, Réanimation Soins Continus<br/> Siami, Shidasp; Centre Hospitalier Sud-Essonne Dourdan-Etampes, Intensive Care Unit<br/> Uhel, Fabrice; APHP, Réanimation médico-chirurgicale, Université de Paris, AP-HP, Hôpital Louis Mourier<br/> Quenot, Jean-Pierre; CHU Dijon, Réanimation médicale<br/> Plantefeve, Gaetan; Centre Hospitalier d'Argenteuil, Service de Médecine Intensive Réanimation<br/> Badie, Julio; Hôpital Nord Franche-Comté - Site de Belfort, Réanimation polyvalente<br/> Schneider, Francis; Hopitaux universitaires de Strasbourg, Medical Intensive Care Unit<br/> Cerf, Charles; Hopital Foch, Intensive Care Unit<br/> Troché, Gilles; Hôpital André Mignot, Intensive Care<br/> Monchi, Mehran; Groupe Hospitalier Sud Ile de France, Intensive Care Unit<br/> Mira, Jean-Paul; Assistance Publique - Hopitaux de Paris, Groupe Hospitalier Paris Centre - Cochin University Hospital - Medical Intensive Care Unit<br/> Francois, Bruno; Centre Hospitalier Universitaire Dupuytren, Réanimation Polyvalente<br/> Chevret, Sylvie; University of Paris<br/> Annane, Djillali; Université Paris-Saclay, Department of Intensive Care;</p> |

1  
2  
3  
4  
5  
6  
7  
8  
9  
10  
11  
12  
13  
14  
15  
16  
17  
18  
19  
20  
21  
22  
23  
24  
25  
26  
27  
28  
29  
30  
31  
32  
33  
34  
35  
36  
37  
38  
39  
40  
41  
42  
43  
44  
45  
46  
47  
48  
49  
50  
51  
52  
53  
54  
55  
56  
57  
58  
59  
60

|                                    |                                                                                                                                         |
|------------------------------------|-----------------------------------------------------------------------------------------------------------------------------------------|
|                                    | INSERM                                                                                                                                  |
| <b>Primary Subject Heading</b> :   | Intensive care                                                                                                                          |
| <b>Secondary Subject Heading</b> : | Infectious diseases                                                                                                                     |
| <b>Keywords</b> :                  | Adult intensive & critical care < INTENSIVE & CRITICAL CARE, Clinical trials < THERAPEUTICS, Respiratory infections < THORACIC MEDICINE |
|                                    |                                                                                                                                         |

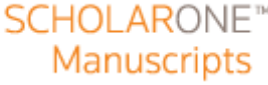

1  
2  
3 Rapid rEcognition of COrticosteRoiD resistant or sensitive Sepsis (RECORDS): Study protocol  
4 for a Multicenter, placebo-controlled, biomarker-guided, adaptive Bayesian design Basket trial.  
5  
6  
7  
8  
9

10 Jérôme Fleuriet PhD<sup>1,4</sup>, Nicholas Heming MD<sup>1,2,3,4</sup>, Ferhat Meziani MD<sup>5</sup>, Jean Reignier MD<sup>6</sup>,  
11 Pierre-Louis Declercq MD<sup>7</sup>, Emmanuelle Mercier MD<sup>8</sup>, Grégoire Muller MD<sup>9</sup>, Gwenhaël Colin  
12 MD<sup>10</sup>, Xavier Monnet MD<sup>3,11</sup>, Adrien Robine MD<sup>12</sup>, Shidasp Siami MD<sup>13</sup>, Fabrice Uhel MD<sup>14</sup>,  
13 MD<sup>10</sup>, Xavier Monnet MD<sup>3,11</sup>, Adrien Robine MD<sup>12</sup>, Shidasp Siami MD<sup>13</sup>, Fabrice Uhel MD<sup>14</sup>,  
14 Jean-Pierre Quenot MD<sup>15</sup>, Gaëtan Plantefève MD<sup>16</sup>, Julio Badie MD<sup>17</sup>, Francis Schneider MD<sup>18</sup>,  
15 Charles Cerf MD<sup>19</sup>, Gilles Troché MD<sup>20</sup>, Mehran Monchi MD<sup>21</sup>, Jean-Paul Mira MD<sup>22</sup>, Bruno  
16 François MD<sup>23</sup>, Sylvie Chevret MD<sup>24</sup>, Djillali Annane MD<sup>1,2,3,4</sup> for the RECORDS consortium  
17 and CRICS-TRIGGERSEP network  
18  
19  
20  
21  
22  
23  
24  
25  
26  
27

28 1- Department of Intensive Care, Raymond Poincaré Hospital, APHP University Versailles Saint  
29 Quentin - University Paris Saclay, France.  
30  
31

32 2- Laboratory of Infection & Inflammation - U1173, School of Medicine Simone Veil, University  
33 Versailles Saint Quentin - University Paris Saclay, INSERM, Garches, France.  
34  
35

36 3- FHU SEPSIS (Saclay and Paris Seine Nord Endeavour to PerSonalize Interventions for Sepsis),  
37 Garches 92380, France  
38  
39

40 4- RHU RECORDS (Rapid rEcognition of COrticosteroiD resistant or sensitive Sepsis), Garches  
41 92380, France  
42  
43  
44

45 5- Department of Intensive Care (Service de Médecine Intensive Réanimation), Nouvel Hôpital  
46 Civil, Hôpital Universitaire de Strasbourg, Strasbourg, INSERM (French National Institute of  
47 Health and Medical Research), UMR 1260, Regenerative Nanomedicine (RNM), FMTS  
48  
49  
50  
51  
52  
53  
54  
55  
56  
57  
58  
59

1  
2  
3 (Fédération de Médecine Translationnelle de Strasbourg), University of Strasbourg (UNISTRA),  
4  
5 Strasbourg, France.

6  
7  
8 6- Médecine Intensive Réanimation, CHU de Nantes, Université de Nantes, Nantes, France.

9  
10 7- Service de Réanimation Polyvalente, Centre Hospitalier de Dieppe, Dieppe, France.

11  
12 8- Medical Intensive Care Unit, University Hospital, Tours, France.

13  
14 9- Groupe Hospitalier Régional d'Orléans, Médecine Intensive Réanimation, Orléans, France.

15  
16 10- Service de Médecine Intensive Réanimation, Centre Hospitalier Départemental de Vendée, La  
17  
18 Roche-sur-Yon, France.

19  
20 11- Université Paris-Saclay, AP-HP, Service de Médecine Intensive-Réanimation, Hôpital de  
21  
22 Bicêtre, DMU4 CORREVE Maladies du Cœur et des Vaisseaux, Inserm UMR S999, CARMAS,  
23  
24 Le Kremlin-Bicêtre, France.

25  
26 12- Réanimation Soins Continus, CH de Bourg-en-Bresse-Fleyriat, 01012 Bourg-en-Bresse,  
27  
28 France.

29  
30 13- Service d'Anesthésie-Réanimation, Centre Hospitalier d'Etampes, Etampes, France.

31  
32 14- Réanimation médico-chirurgicale, Université de Paris, AP-HP, Hôpital Louis Mourier,  
33  
34 Colombes, France.

35  
36 15- Médecine Intensive et Réanimation, CHU François Mitterrand, Lipness Team, centre de  
37  
38 recherche INSERM Lipides, Nutrition, Cancer - UMR1231, and INSERM CIC 1432,  
39  
40 Épidémiologie Clinique, Université de Bourgogne-Franche Comté, Dijon, France.

41  
42 16- Réanimation Polyvalente, Centre Hospitalier Victor Dupouy, Argenteuil, France.

43  
44 17- Réanimation polyvalente, Hôpital Nord Franche-Comte CH Belfort, Belfort, France.

45  
46 18- Hôpitaux Universitaires de Strasbourg, Service de Médecine Intensive-Réanimation, Hôpital  
47  
48 de Hautepierre I, Strasbourg, France.

1  
2  
3 19- Intensive Care Unit, Foch Hospital, Suresnes, France.  
4

5 20- Centre Hospitalier André Mignot, Versailles, France.  
6

7  
8 21- Intensive Care Unit, Groupe Hospitalier Sud Ile de France, 77000 Melun, France.  
9

10 22- Assistance Publique–Hôpitaux de Paris, Groupe Hospitalier Universitaire de Paris Centre,  
11 Hôpital Cochin, Réanimation Médicale, and Université Paris Descartes.  
12  
13

14 23- Réanimation Polyvalente, INSERM Centre d'Investigation Clinique (CIC) 1435, Centre  
15 Hospitalier Universitaire (CHU) Dupuytren, INSERM Unité Mixte de Recherche (UMR) 1092,  
16  
17 Faculté de Médecine, Université de Limoges, France.  
18  
19

20  
21 24-Service de Biostatistique, Hôpital Saint-Louis (AP-HP), Université de Paris, INSERM  
22 UMR1153, France.  
23  
24  
25

26  
27  
28 Correspondence to : Professor Djillali Annane, General ICU, Raymond Poincaré hospital  
29 (APHP), School of medicine Simone Veil (University Paris Saclay-campus University of  
30 Versailles SQY), 104 boulevard Raymond Poincaré, 92380 Garches, France  
31  
32  
33

34  
35 Phone: +33 1 47107778  
36

37 Email: [djillali.annane@aphp.fr](mailto:djillali.annane@aphp.fr)  
38  
39  
40  
41  
42  
43  
44  
45  
46  
47  
48  
49  
50  
51  
52  
53  
54  
55  
56  
57  
58  
59  
60

**Abstract (216)**

**Introduction.** Corticosteroids affect variably survival in sepsis trials, suggesting heterogeneity in patients' response to corticosteroids. The RECORDS trial aimed at defining endotypes associated with adults with sepsis responsiveness to corticosteroids.

**Methods and analysis.** RECORDS a multicenter, placebo-controlled, biomarker-guided, adaptive Bayesian design Basket trial will randomly assigned to a biomarker stratum 1800 adults with community acquired pneumonia, vasopressor dependent sepsis, septic shock, or Acute Respiratory Distress Syndrome. In each stratum, patients will be randomly assigned to receive a 7-day course of hydrocortisone and fludrocortisone or their placebos. COVID-19 patients be treated with a 10-day standard course of dexamethasone and randomized to fludrocortisone or its placebo. Primary outcome will be 90-day death or persistent organ dysfunction. Large simulation study will be performed across a range of plausible scenarios to foresee power to detect a 5-10% absolute difference with corticosteroids. We will assess subset-by-treatment interaction by estimating in a Bayesian framework two quantities: (i) measure of influence, relying on the value of the estimation of corticosteroids effect in each subset, and (ii) measure of interaction.

**Ethics and dissemination.** The protocol was approved by the Ethics Committee (*Comité de Protection des Personnes*, CPP Dijon, France), on April 6, 2020. Trial results will be disseminated at scientific conferences and results will be published in peer reviewed journals.

**Registration.** ClinicalTrials.gov number NCT04280497.

**Protocol version N°7.0 dated 11/01/2023**

1  
2  
3 **Key words:** adults, precision medicine, community acquired pneumonia, ARDS, sepsis,  
4  
5 endotypes, multiomics, biomarkers  
6

7  
8 **Words count:** 4461  
9

## 10 11 12 **Article summary** 13

### 14 15 Strengths and limitations of this study

- 16 - Observational period providing preliminary clinical and biological data.
- 17  
18 - Ongoing basket adaptative trial integrating biomarkers and signatures, designed to  
19  
20 personalize corticosteroid therapy in sepsis.  
21  
22
- 23 - Patients free of COVID19 and Influenza are stratified by biomarker/signature and are  
24  
25 randomized to receive either combined glucocorticoid (hydrocortisone, or if SARS-CoV-  
26  
27 2 positive, open-label dexamethasone) and mineralocorticoid (fludrocortisone) or  
28  
29 placebo.  
30  
31
- 32 - New biomarkers or signatures are continuously included and assessed in the trial.  
33  
34
- 35 - Sequential intermediate analyses using a Bayesian model aimed at identifying relevant  
36  
37 predictive biomarkers.  
38  
39  
40  
41  
42  
43  
44  
45  
46  
47  
48  
49  
50  
51  
52  
53  
54  
55  
56  
57  
58  
59  
60

## Introduction

The World Health Organization (WHO) identified sepsis as a high priority condition due to its incidence (~49 million cases/year), mortality (~11 million fatalities/year) and morbidity (cognitive decline at 5 years in up to half of survivors).<sup>1</sup> Dysregulated immune and endogenous cortisol responses to infection are hallmarks of sepsis, requiring prompt source control, anti-infective treatment, and cardiorespiratory management. Both overwhelming systemic inflammation and impaired endogenous cortisol response to infection are improved by the administration of corticosteroids.<sup>2</sup> Evidence from 61 trials accounting for 12,192 patients, including both children and adults with sepsis, suggested that corticosteroids saved 1 additional life every 33 treated patients.<sup>3</sup> There was no evidence of any difference in corticosteroids effects on survival between children and adults (Chi<sup>2</sup> = 0.29; df = 1; P = 0.62; I<sup>2</sup> = 0%), between uncomplicated sepsis, septic shock, ARDS, and CAP (Chi<sup>2</sup> = 7.60; df = 3; P = 0.06; I<sup>2</sup> = 60.5%). International guidelines (panel including consumers) recommended administrating corticosteroids in sepsis.<sup>4</sup> Likewise, the WHO recommended treatment with corticosteroids for COVID-19 patients requiring respiratory support, in keeping with results from the RECOVERY trial.<sup>5</sup> However, survival benefits of corticosteroids varied across trials highlighting the need to identify optimal target populations for corticosteroids.<sup>6-</sup>

<sup>9</sup> The effects of corticosteroids on survival from sepsis are independent of age, gender, disease severity, type or source of infection, or type of pathogen.<sup>3</sup> No reliable, routinely available diagnostic test predicts the response to corticosteroids in sepsis. Nevertheless, preliminary studies in adults<sup>10</sup> and children with sepsis<sup>11</sup> suggested that transcriptomic signatures may be associated with increased mortality in corticosteroids treated patients. Additionally, machine learning derived for individual prediction outperformed one size-fits-all decisions of hydrocortisone treatment in



1  
2  
3 septic shock.<sup>12</sup> Theoretically, survival benefits related to the administration of corticosteroids  
4  
5 require (i) hyperinflammation in response to an infection and (ii) intact cellular mechanisms  
6  
7 enabling corticosteroid bioactivity.<sup>2</sup> Both hyperinflammation and cellular mechanisms enabling  
8  
9 corticosteroid bioactivity are potential biomarkers of corticosteroid sensibility or resistance.

10  
11 The RECORDS trial aims at identifying biomarkers defining sepsis populations who may either  
12  
13 benefit or be harmed by corticotherapy. Biomarkers assessed in this trial are selected through  
14  
15 analysis of biological and clinical data from a previous cohort,<sup>8</sup> from the observational period of  
16  
17 this current trial and from any relevant newly reported cohort.  
18  
19  
20  
21  
22  
23

## 24 **Methods and analysis**

### 25 26 27 28 *Study design and oversight*

29  
30  
31  
32  
33 The study is divided into two distinctive stages, e.g. a run-in prospective observational cohort  
34  
35 followed by a biomarker-guided adaptive randomized controlled trial. As per request from the  
36  
37 French National Agency for Drug Safety, randomization is first stratified by SARS-CoV-2 status  
38  
39 (see figure 1). Patients tested positive for SARS-CoV-2 patients are then randomized with a 1:1  
40  
41 allocation ratio to receive either dexamethasone and fludrocortisone or dexamethasone and  
42  
43 fludrocortisone placebo. Subsequently, patients tested negative for SARS-CoV-2 are tested for  
44  
45 influenza. Patients tested positive for Influenza are then randomized for treatment (hydrocortisone  
46  
47 (HC) and fludrocortisone (FC) or their respective placebos). Patients negative for SARS-CoV-2  
48  
49 and Influenza are first randomly assigned to a biomarker/signature stratum among all the  
50  
51 biomarkers/signatures available at the time of randomization for the patient; then, those patients  
52  
53  
54  
55  
56  
57  
58  
59  
60

1  
2  
3 are randomized with a 1:1 allocation ratio to either HC and FC or their respective placebos, using  
4 the randomization list from this stratified biomarker/signature result. Patients positive to other  
5 respiratory viruses are not mandatorily assigned to the arms corresponding to their infections (other  
6 respiratory viruses (+)) as they are randomly assigned to any biomarker/signature arms of the two-  
7 step randomization (see figure 1 and “Allocation of stratification” section below).  
8  
9  
10  
11  
12  
13

14  
15  
16  
17 The protocol and qualification of all investigators were approved by the Ethics Committee (*Comité*  
18 *de Protection des Personnes*, CPP Dijon, France), on April 6, 2020 and by the French National  
19 Agency for Drug Safety (ANSM, France) on April 9, 2020. Inclusion in the observational part of  
20 the trial started on April 10, 2020 in 19 centers in France and ended on June 10, 2021 with last  
21 patient follow-up on December 2021. The interventional part of the trial started on June 10, 2021,  
22 in 20 centers nationwide. Recruitment is expected to be completed by first trimester of 2025.  
23 Follow-up of the last patient is expected to be completed by last trimester of 2025.  
24  
25  
26  
27  
28  
29  
30  
31

32  
33 Informed written consent of the patient is to be obtained prior to any act related to the study.  
34 Whenever the patients are unable to consent themselves, consent of a legally authorized  
35 representative is sought (France, art. L 1122-1 CSP). Whenever the patient is unable to consent  
36 and in the absence of a legally authorized representative, the ethics committee allowed for consent  
37 to be waived. Deferred consent or consent of a legally authorized representative is to be obtained  
38 for the continuation of the study procedures and utilization of patient’s data and biological samples.  
39  
40  
41  
42  
43  
44  
45  
46  
47 A data safety and monitoring board (DSMB) including experts in intensive care and in infectious  
48 diseases, was set up before recruitment of the first patient. DSMB members have full access to the  
49 raw data of the trial and meet on a regular basis.  
50  
51  
52  
53  
54  
55  
56  
57  
58  
59  
60

1  
2  
3 Data monitoring is performed by the sponsor (Assistance Publique-Hôpitaux de Paris *AP-HP*,  
4 *Paris Ile-de-France Ouest Clinical Trial Unit, URC HUPIFO*). The sponsor has full access to  
5 patients' charts and checks for accuracy all data recorded onto the electronic case report form  
6 (eCRF). Data management is performed by the sponsor.  
7  
8  
9

10  
11  
12 The Biological Resource Centre of the Raymond Poincaré Hospital (APHP), provides centers with  
13 sample kits for biomarker measurements, collects and stores samples obtained from centers.  
14

15  
16 A central pharmacy (Agence Générale des Equipements et Produits de Santé, AGEPS) labels study  
17 drugs and ships them to participating centers. Unused drugs are destroyed by local pharmacist.  
18  
19

20  
21 The trial is registered at ClinicalTrials.gov under number NCT04280497.  
22

23  
24 Data access: trial's investigators will have access to all trial's data and will vouch for the integrity  
25 of the data. Data will be shared within 6 months of the publication of the results of the primary  
26 analysis after trial completion. To access data third party will have to sign with the trial sponsor a  
27 data sharing agreement.  
28  
29  
30  
31  
32

### 33 34 35 ***Study Participants: inclusion and exclusion criteria, conduct of the trial*** 36

#### 37 38 39 Inclusion criteria 40

41  
42 ICU patients aged  $\geq 18$  years will be eligible for inclusion into the trial if they meet all of the  
43 following criteria: 1) proven or suspected infection as the main diagnosis (Sepsis-3 definition)<sup>13</sup>,  
44 2) Community Acquired Pneumonia (CAP, as defined by the IDSA/ATS CAP severity criteria,  
45 table 1 of Metlay et al., 2019<sup>14</sup>), or vasopressor-dependent sepsis (require vasopressor to maintain  
46 mean blood pressure of 65 mmHg and lactate level of  $< 2$  mmol/L), or septic shock<sup>13</sup> or infection-  
47 triggered Acute Respiratory Distress Syndrome (ARDS, Berlin definition)<sup>15</sup>), 3) tested for one or  
48  
49  
50  
51  
52  
53  
54  
55  
56  
57  
58  
59

1  
2  
3 more trial-specific biomarkers (see figure 1), 4) affiliated to the French social security or benefiting  
4  
5 from universal health coverage. Patients under guardianship or curatorship may be included.  
6  
7  
8  
9

### 10 Exclusion criteria

11  
12 Patients will not be eligible for the trial if they meet at least one of the following criteria: 1)  
13  
14 expected death or withdrawal of life-sustaining treatments within 48 hours, 2) previously enrolled  
15  
16 in the study, 3) formal indication for corticosteroids according to most recent international  
17  
18 guidelines, 4) vaccination with live virus within the past 6 months, 5) hypersensitivity to  
19  
20 hydrocortisone or fludrocortisone or (microsined betamethasone dipropionate) or any of their  
21  
22 excipients (SPC), 6) pregnancy, women of childbearing potential not using contraception, 7)  
23  
24 nursing women.  
25  
26  
27  
28  
29  
30

### 31 *Study measurements and procedures*

#### 32 Initial study visit

33  
34 After obtaining consent, a study visit is performed in order to collect 1) patient demographics, 2)  
35  
36 characteristics of infection, 3) severity of illness (SAPS II and SOFA score), 4) pre-existing  
37  
38 comorbidities as defined by the Charlson comorbidity index, Clinical Frailty Scale, 5) core  
39  
40 temperature and vital signs, 6) central hemodynamic data, 7) standard laboratory data including  
41  
42 serum and urinary electrolytes, creatinine, urea, cholesterol, triglycerides and glucose levels,  
43  
44 arterial lactate levels, arterial oxygen tension, hemoglobin oxygen saturation, arterial pH, white  
45  
46 blood cell count, hemoglobin and hematocrit levels, INR, platelet count, total bilirubin level,  
47  
48 microbiology and virology, results of the ACTH test, 8) measurement of biomarkers (serum  
49  
50 endocan, monocytes expression of glucocorticoid induced leucine zipper (GILZ) and of dual  
51  
52  
53  
54  
55  
56  
57  
58  
59  
60

1  
2  
3 specificity protein phosphatase 1 (DUSP-1), monocyte distribution width (MDW), and blood  
4 genomic, transcriptomic and metabolomic measurements, exhaled air metabolomic) 9)  
5 interventions including mechanical ventilation, renal replacement therapy, vasopressors,  
6 administration of open label corticosteroid, thiamine, vitamin C, other vitamins, nutrition,  
7 intravenous fluids, blood products, anticoagulants, sedatives, stress ulcer prophylaxis, and  
8 antimicrobials, 10) results of the skin vasoconstrictor response to glucocorticoids. The screening  
9 visit ends with the randomization of eligible patients within 24 hours of obtaining the results of  
10 intelligent algorithms and biomarkers.  
11  
12  
13  
14  
15  
16  
17  
18  
19  
20

### 21 Endotyping

22  
23 In the COVID-19 stratum, patients will be randomized in a single step (figure 1) to receive  
24 dexamethasone 6mg per day for 10 days<sup>5</sup> combined with fludrocortisone or its placebo. The added  
25 value of a drug exhibiting a mineralocorticoid activity is worth evaluating in view of the role of  
26 the angiotensin-converting enzyme 2 receptor and endothelial dysfunction in the pathogenesis of  
27 COVID-19.<sup>16</sup> The Influenza virus stratum and non-Influenza respiratory virus stratum aim at  
28 filling the evidence gap related to the lack of randomized trial having assessed corticotherapy in  
29 viral pneumonia related sepsis.<sup>17</sup> Otherwise, patients' randomization will be stratified according  
30 to candidate biomarkers, selected from: 1) signatures described in the literature, 2) biomarkers  
31 identified from RECORDS data obtained in the observational period of the study and 3) any  
32 national and/or international guidelines (figure 2). At the onset of the trial, 11  
33 biomarkers/signatures had been identified (Critical Illness-Related Corticosteroid Insufficiency  
34 (CIRCI)<sup>18</sup>, endocan<sup>19</sup>, monocyte distribution width (MDW)<sup>20</sup>, lymphocyte count<sup>20</sup>, transcriptome  
35 sepsis response signature (SRS)<sup>10,21</sup>, adaptive immunity signature (endotype A/B)<sup>11,22</sup>,  
36 Glucocorticoid-Induced Leucine Zipper (GILZ)<sup>23</sup>, Dual Specificity Phosphatase 1 (DUSP-1),  
37  
38  
39  
40  
41  
42  
43  
44  
45  
46  
47  
48  
49  
50  
51  
52  
53  
54  
55  
56  
57  
58  
59  
60

1  
2  
3 cutaneous vasoconstrictor to glucocorticoids<sup>24</sup>, machine learning algorithm 1<sup>12</sup>, machine learning  
4 algorithm 2), as described below. The CIRCI stratum is defined by baseline total cortisol of  
5  
6 10µg/dL or less or a maximum increment in total cortisol of less than 9µg/dL at 30 and 60 minutes  
7  
8 following a 250µg intravenous bolus of cosyntropin.<sup>18</sup> Endocan is an endothelial peptidoglycan  
9  
10 that contributes to regulate inflammation by counteracting leukodiapedesis, a key target for  
11  
12 corticosteroids.<sup>19</sup> We identified serum levels of endocan below 12.8ng/ml as a marker of  
13  
14 hyperinflammation in the run-in period of RECORDS trial. The Monocyte Distribution Width  
15  
16 stratum is defined by MDW >25.<sup>20</sup> The lymphocytes count stratum is defined by lymphocyte count  
17  
18 below 870x10<sup>3</sup>/ml, according to a recent study suggesting that lymphopenia was associated with  
19  
20 corticosteroids resistance.<sup>20</sup> The Transcriptomic Sepsis Response Signature stratum is based on  
21  
22 two distinct signatures suggesting immune suppression (SS1) and relative immune competency  
23  
24 (SRS2).<sup>21</sup> Using generalized linear model based on a set of seven genes (DYRK2, CCNB1IP1,  
25  
26 TDRD9, ZAP70, ARL14EP, MDC1, and ADGRE3), hydrocortisone may be associated with  
27  
28 increased mortality in SRS2 patients.<sup>10</sup> The endotype A/B stratum is based on transcriptomic  
29  
30 analysis of 100 genes reflecting the adaptive immunity and glucocorticoid receptor signaling. In  
31  
32 children with sepsis, two distinct endotypes were identified, endotype A characterized by immune  
33  
34 suppression and a higher risk for mortality when compared to endotype B.<sup>22</sup> The Glucocorticoid-  
35  
36 Induced Leucine Zipper stratum and Dual Specificity Phosphatase 1 stratum are defined by  
37  
38 reduced expression of GILZ and DUSP-1 by unstimulated isolated circulating monocytes. GILZ<sup>23</sup>  
39  
40 and DUSP-1 are key endogenous regulators of the immune response. Preliminary data from the  
41  
42 observational period of RECORDS suggested an association between the spontaneous expression  
43  
44 of GILZ and of DUSP-1 and increased mortality in serious COVID-19 (unpublished). The  
45  
46 cutaneous vasoconstrictor response to glucocorticoids stratum is defined according to previous  
47  
48  
49  
50  
51  
52  
53  
54  
55  
56  
57  
58  
59  
60

report in asthma.<sup>24</sup> Briefly, the test is performed by applying 30µg/ml betamethasone to the skin of the forearm. The degree of skin blanching is assessed after 12h of exposure with a score ranging from 0 to 4; 0 no skin blanching, 1 skin blanching is less than 50% of the area of application, 2 skin blanching is more than 50% of the area of application, 3 if blanching recovers the whole area of application, and 4 if blanching expands beyond the area of application. A score of 2 or less indicates resistance to corticosteroids. A photography of the forearm restricted to the tested skin area will be recorded. The intelligent algorithms strata include two algorithms aiming at predicting the response to corticosteroids, one developed through machine learning<sup>12</sup> and another one using other machine learning modeling approaches (unpublished), both being embedded into the eCRF.

### Follow-up

All patients are followed-up at 3 and 6 months from randomization. The details of follow-up are given in table 1.

Table 1: Data collection and conduct of the trial

| Variables/Visits                                                                                                                     | Daily data until ICU discharge or 90 days (whichever occurs first) | Specific measures at day 1 & 7 | Last study visit (90- and 180-day data) |
|--------------------------------------------------------------------------------------------------------------------------------------|--------------------------------------------------------------------|--------------------------------|-----------------------------------------|
| Vital status                                                                                                                         | X                                                                  |                                | X                                       |
| Location (ICU/date of discharge), hospital ward/date of discharge, rehabilitation centre, long-term facility, home/date of discharge |                                                                    |                                | X                                       |

|                                                                                                    |                                                                                                                                                                                                                                                                                                                             |   |   |   |
|----------------------------------------------------------------------------------------------------|-----------------------------------------------------------------------------------------------------------------------------------------------------------------------------------------------------------------------------------------------------------------------------------------------------------------------------|---|---|---|
| 1<br>2<br>3<br>4<br>5<br>6                                                                         | Protocol adherence (receipt of every IMP dose until treatment completion)                                                                                                                                                                                                                                                   | X |   | X |
| 7<br>8<br>9<br>10<br>11<br>12<br>13<br>14<br>15<br>16<br>17<br>18<br>19<br>20<br>21                | Co-interventions (mechanical ventilation, renal replacement therapy, vasopressors, unblinded corticosteroids, thiamine, vitamin C, other vitamins, nutrition, intravenous fluids, blood products, anticoagulants, sedatives, stress ulcer prophylaxis, & antimicrobials)                                                    | X |   | X |
| 22<br>23<br>24<br>25                                                                               | Core temperature (daily lowest & highest value)                                                                                                                                                                                                                                                                             | X |   | X |
| 26<br>27<br>28<br>29<br>30<br>31<br>32                                                             | Vital signs (lowest & highest values for heart rate, systolic & diastolic blood pressure)                                                                                                                                                                                                                                   | X |   | X |
| 33<br>34                                                                                           | Central hemodynamic data                                                                                                                                                                                                                                                                                                    | X |   |   |
| 35<br>36<br>37<br>38<br>39<br>40<br>41<br>42<br>43<br>44<br>45<br>46<br>47<br>48<br>49<br>50<br>51 | Standard laboratory data (serum and urinary electrolytes, creatinine, urea, cholesterol, triglycerides & glucose levels, arterial lactate levels, arterial oxygen tension & hemoglobin oxygen saturation, arterial pH, white blood cell counts, hemoglobin & hematocrit levels, INR, platelet count, total bilirubin level) | X |   |   |
| 52<br>53<br>54<br>55<br>56<br>57<br>58<br>59<br>60                                                 | Microbiological or virological samples                                                                                                                                                                                                                                                                                      |   | X |   |



|                                                                                                                                                                                               |   |   |   |
|-----------------------------------------------------------------------------------------------------------------------------------------------------------------------------------------------|---|---|---|
| Other sampling left at the physicians' discretion                                                                                                                                             | X |   |   |
| Whole blood samples for measurements of biomarkers                                                                                                                                            |   | X |   |
| Glasgow coma scale<br>Cognitive function                                                                                                                                                      |   |   | X |
| Muscular Disability Rating Scale (MDRS) score                                                                                                                                                 |   |   | X |
| Health-Related Quality of Life (HRQoL, EQ-5D-5L) <sup>27</sup>                                                                                                                                |   |   | X |
| PROMIS® (Fatigue 13a, Ability to participate in social roles and activities 8a, Physical function 8b, Emotional distress-Depression 8b, Emotional distress-Anxiety 8a, Cognitive function 8a) |   |   | X |

Vital status by day 90 after randomization will be collected from the medical file and/or through phone calls with patients or their legal representative.

### ***Outcomes***

The primary outcome for the sequential analyses will be the number of vasopressor-free days at day 28 as the measure of efficacy, and the occurrence of severe adverse events within the first 28 days as the measure of toxicity.

1  
2  
3 The primary outcome of the terminal analysis, assessed at 90 days, is a composite of death or  
4 persistent organ dysfunction – defined as SOFA score >6 or a continued dependency on either  
5 mechanical ventilation, new renal replacement therapy, or vasopressors.<sup>8,25</sup> The primary endpoint  
6 is a binary composite variable. Patient will be classified as a success if alive on day 90 and free of  
7 vasopressor therapy, mechanical ventilation, renal replacement therapy, and organ dysfunction.  
8 Patient will be classified as a failure if (i) death occurred within the 90 days following  
9 randomization, (ii) dependent on either vasopressor, mechanical ventilation, RRT, or (iii) exhibited  
10 a SOFA score >6.  
11  
12  
13  
14  
15  
16  
17  
18  
19  
20  
21  
22  
23

24 Secondary outcomes include: 1) Mortality at 7, 14 and 28 days and 6 months; 2) Vasopressor free  
25 days: defined as the number of days with permanent hemodynamic stability in the absence of any  
26 vasopressor agent including norepinephrine, phenylephrine, epinephrine, dopamine, vasopressin  
27 or its analogs. When a patient dies while receiving vasopressors, the number of vasopressor free  
28 days is arbitrarily set at 0; 3) Mechanical ventilation free days: defined as the number of days with  
29 permanent appropriate oxygenation while the patient is extubated and breathing spontaneously,  
30 i.e. no need for non-invasive ventilation, high flow oxygen or continuous positive airway pressure  
31 (CPAP). Other uses of non-invasive ventilation (e.g., chronic night-time use for chronic  
32 obstructive pulmonary disease) are not compatibilized. When a patient dies while receiving  
33 mechanical ventilation or is discharged home while receiving mechanical ventilation, the number  
34 of mechanical ventilation free days is arbitrarily set at 0; 4) Organ dysfunction free days: Organ  
35 function (including renal function) will be assessed using the SOFA score.<sup>26</sup> Organ dysfunction  
36 will be defined by a SOFA score > 6.<sup>8</sup> Organ dysfunction free days is defined by the number of  
37 days with a total SOFA score of 6 or less. When a patient dies before the SOFA decreased to 6 or  
38  
39  
40  
41  
42  
43  
44  
45  
46  
47  
48  
49  
50  
51  
52  
53  
54  
55  
56  
57  
58  
59  
60

1  
2  
3 less, the number of organ dysfunction free days is arbitrarily set at 0; 5) 6-month HRQoL in  
4 survivors assessed using the EQ-5D-5L.<sup>27</sup> This standardised questionnaire was developed to  
5 provide a simple, generic measure of health for clinical and economic appraisal. It is made up of  
6 two components: health status description and health status self-assessment. Health status is  
7 assessed using five dimensions; mobility, self-care, usual activities, pain/discomfort, and  
8 anxiety/depression. Health status self-assessment reports on patients overall health status using a  
9 visual analogue scale; 6) Fatigue, ability to partake in social activities, physical function, emotional  
10 distress, depression, anxiety and cognitive function are assessed using the PROMIS short form  
11 questionnaire 7) Proportion of patients with a decision to withhold and/or withdraw active  
12 treatments; 8) ICU and hospital length of stay; 9) Rate of ICU re-admission up to 180 days after  
13 randomization.  
14  
15  
16  
17  
18  
19  
20  
21  
22  
23  
24  
25  
26  
27  
28  
29  
30

31 Safety endpoints include: proportion of patients affected by any serious adverse event associated  
32 with corticosteroids, 1) hospital-acquired infection (CDC. Healthcare-Associated Infections  
33 (HAIs) progress report. 2020) within 90 days of randomization, 2) hyperglycemia (blood glucose  
34 level >150mg/dl) and hypernatremia (serum sodium > 145 mmol/L) during the ICU stay (or up to  
35 day 90, whichever occurs first), 3) Gastroduodenal bleeding requiring transfusion or hemostatic  
36 treatment during the ICU stay (or up to day 90, whichever occurs first), 4) neurological disorder  
37 (coma, stroke or muscle weakness, as defined below) up to 180 days from randomization. Coma  
38 is defined by a Glasgow coma score <8 in the absence of sedation. Neuromuscular sequelae are  
39 assessed using the Muscular Disability Rating Scale (MDRS), with a score of 1 indicating no  
40 deficit, 2 minor deficit with no functional disability, 3 distal motor deficit, 4 mild-to-moderate  
41 proximal motor deficit, and 5 severe proximal motor deficit.  
42  
43  
44  
45  
46  
47  
48  
49  
50  
51  
52  
53  
54  
55  
56  
57  
58  
59  
60

### ***Randomization***

The period from inclusion to randomization, including the period of laboratory testing for biomarkers, should not exceed 24 hours.

A computer process is used to generate allocation sequences in a 1:1 ratio, independently from healthcare staff, research personnel, ICU personnel, participants, members of the Executive and Steering Committees, or the data analyst.

Randomization will be concealed by being centralized and performed with an internet-centralized service running 24/7 imbedded in the electronic Case Report Form (eCRF). Healthcare staff, research personnel, ICU personnel, participants, members of the Executive and Steering Committees, and the data analyst will be blinded to treatment allocation. Only the central pharmacist, from the General Agency of Equipment and Health Products (AGEPS – APHP) will be unblinded.

### **Allocation of stratification**

Stratification of randomization between the two trial arms first concerns the SARS-CoV2 results, generating a separate 1:1 randomization list for COVID-19 patients between fludrocortisone or its placebo, given all treated with dexamethasone. The second list concerns the Influenza positive patients, between hydrocortisone and fludrocortisone versus their respective placebos. Negative SARS-CoV-2 and Influenza patients are then randomly allocated to a randomization list amongst all assessed biomarkers for each patient based on data and strata cutoffs, and then randomized to hydrocortisone and fludrocortisone or their respective placebos according to the list of the biomarker/signature result. This will ensure the balance of treatment groups among each biomarker/signature strata.

Centers are not required to assess all biomarkers for a given patient. The randomization algorithm will run on all the available biomarkers (a single biomarker is sufficient). The randomization algorithm runs separately while communicating with the eCRF. Data related to biomarker results, virology results and input required for determining intelligent algorithms are sent to the randomization algorithm.

## ***Interventions***

### Experimental treatments

Investigational medicinal products are presented in numbered boxes, labelled for this study according to the Good Manufacturing Practices under the responsibility of AGEPS. Each numbered box contains enough corticosteroids or placebo to fully treat one patient. A drug box contains 30 vials of hydrocortisone 100mg or placebo and 1 blister of 10 tablets of fludrocortisone 50µg or placebo.

Hydrocortisone hemisuccinate (SERB, Paris) or its placebo is administered as a 50mg intravenous bolus every 6 hours for seven days. Fludrocortisone or its placebo (HAC Pharma, Caen) is administered as a 50µg tablet via a nasogastric tube once a day in the morning, for seven days.

COVID-19 patients are to be treated with open label dexamethasone (6mg) once a day over 10 days and 50µg fludrocortisone or its placebo (HAC Pharma, Caen) via a nasogastric tube or orally for patients not requiring a nasogastric tube, once a day in the morning, for seven days.

### Allowed co-interventions

Treatments are allowed according to best practice guidelines.<sup>28</sup> These treatments may include, mechanical ventilation, renal replacement therapy, vasopressor therapy, thiamine, nutrition

1  
2  
3 therapies including multivitamins, intravenous fluids, blood products, sedatives, and  
4 antimicrobials. We will carefully record the use of these treatments. All recommended treatments  
5 (including IL-6 inhibitors and JAK inhibitors) in severe COVID-19 are authorized to be used in  
6 this trial.  
7  
8  
9  
10  
11  
12  
13

#### 14 Forbidden interventions

15  
16 Hydrocortisone and other corticosteroids whatever the dose and the route (except local  
17 administration, nebulization not being considered as a local administration) are not allowed, except  
18 dexamethasone 6mg per day for 10 days in patients with COVID-19. If an unavoidable indication  
19 occurs after randomization (e.g. autoimmune disease), the patient should be treated. In this case,  
20 study treatments are to be suspended to avoid the administration of unnecessarily high-dose of  
21 hydrocortisone. However, short-duration administration of open-labelled corticosteroids is  
22 allowed for prevention of post-extubation laryngeal edema.  
23  
24  
25  
26  
27  
28  
29  
30  
31  
32

33 Continuous infusion of neuromuscular blocking agents is to be avoided. Whenever neuromuscular  
34 blocking drugs are mandatory (e.g. for severe ARDS), it should be interrupted every 12 hours to  
35 avoid prolonging the treatment longer than necessary.  
36  
37  
38  
39  
40  
41

#### 42 ***Statistical analysis***

43  
44 A full statistical analysis plan will be reported in a separate paper.  
45  
46

#### 47 Sample size

48  
49 Sequential analyses will use the number of vasopressor-free days at day 28 as the measure of  
50 efficacy, and the occurrence of severe adverse events within the first 28 days as the measure of  
51 toxicity. In a recent study,<sup>8</sup> the number of vasopressor-free days at day 28 with  
52  
53  
54  
55  
56  
57  
58  
59  
60

1  
2  
3 hydrocortisone+fludrocortisone was  $17.1 \pm 10.8$  versus  $15.0 \pm 11.1$  in placebos. Thus, a sample of  
4  
5  $176 \times 2 = 352$  patients achieves 80.04 % power to reject the null hypothesis of equal means when the  
6  
7 mean difference between arms is 3 days with SD of 10 days, and with a significant level (alpha)  
8  
9 of 0.05 using a two-sample t-test. For interactions to be detected with the same power as the overall  
10  
11 effect, sample sizes should be inflated<sup>29</sup>, estimated here at a multiple of fourfold; therefore, to  
12  
13 handle potential dropouts, a sample was estimated at 1800 patients. Bayesian inference will be  
14  
15 used for sequential analyses.  
16  
17

18  
19 To detect a 10% absolute risk reduction from 45% to 35% in 90-day all-cause mortality,<sup>8</sup> a sample  
20  
21 size of 373 evaluable patients per arm (thus a total of 746 patients) is required to reach 80% power.  
22  
23 The planned sample of 1800 patients will achieve a 99.16% power to reject the null hypothesis of  
24  
25 equal mortality when the difference between arms is 10% overall, and with a 5% alpha level.  
26  
27 Sample sizes were computed using PASS 15 software (2017).  
28  
29

30  
31 The power to detect this difference within each group of analysis will depend on the prevalence of  
32  
33 each biomarker of interest.  
34  
35

### 36 37 38 Performance of the Bayesian design

39  
40 To restrict inclusion to patients most likely to benefit from corticosteroids during trial accrual, an  
41  
42 enrichment design will be used, based on treatment-by-subset interaction. Two main objectives  
43  
44 will be considered: (1) To estimate corticosteroid marginal effect; and (2) To test for heterogeneity  
45  
46 across subsets. We previously reported that this strategy successfully selected patients sensitive to  
47  
48 treatment and discarded the less sensitive ones.<sup>30</sup> Performance of design will be challenged using  
49  
50 a large simulation study performed across a range of plausible scenarios to foresee power to detect  
51  
52  
53  
54  
55  
56  
57  
58  
59

1  
2  
3 a 5-10% absolute difference with corticosteroids, considering a fixed sample size of 1800 patients,  
4  
5 several sizes of each subset, under several scenarios of treatment effect and interaction.  
6  
7  
8  
9

### 10 Data analysis

11 All patients, whatever their biomarker status will be randomized across the two treatment groups.  
12  
13 Statistical analysis will be conducted using “biomarker-by-treatment interaction” with separate  
14  
15 tests, given the high number of potential biomarkers of interest. This is also referred to as “separate  
16  
17 randomization designs” and “separate by treatment interaction designs”.  
18  
19  
20

21 The analysis plan will be based on separate estimation of corticosteroid effect in each biomarker-  
22  
23 defined stratum to detect treatment by subgroup interactions: in other words, it aims at determining  
24  
25 whether the corticosteroid effect may differ according to each biomarker/signature results,  
26  
27 assessed through an interaction measure.  
28  
29

30 We will assess subset-by-treatment interaction by estimating two quantities<sup>30</sup>: (i) measure of  
31  
32 influence (efficacy), relying on the value of the estimation of corticosteroids effect in each subset,  
33  
34 and (ii) measure of interaction, either based on the Gail and Simon statistics or derived from the  
35  
36 Millen’s criteria based on the ratio of the estimated effect in both subsets.<sup>31</sup> In a Bayesian setting,  
37  
38 the two criteria can be expressed as posterior probabilities related to the comparison of outcomes  
39  
40 across the arms and/or the subsets. Decision thresholds will be defined based on a grid search to  
41  
42 optimize the rate of false positive and false negative findings based on large simulated trials.  
43  
44  
45

46 This analysis will be performed only for biomarkers with at least 100 available measures. Main  
47  
48 interaction measures will consider only patients randomly allocated to the specific strata under  
49  
50 study. As sensitivity analyses, we will also consider all the patients with the available biomarker,  
51  
52 possibly handling imbalances across treatment arms using propensity score-based approaches.  
53  
54  
55  
56  
57  
58  
59



1  
2  
3  
4  
5 Analysis of secondary outcomes will be performed at the time of terminal analysis. Mortality will  
6  
7 be estimated by the Kaplan-Meier method, compared by the log-rank test across groups.  
8  
9 Vasopressor free days, Mechanical ventilation free days, and Organ dysfunction free days, will be  
10  
11 compared by the nonparametric Wilcoxon rank sum test. HRQoL will be analyzed by a joint mixed  
12  
13 model for longitudinal and survival data, that is, a shared parameter model where the HRQoL and  
14  
15 survival models share common random effect(s).  
16  
17

18  
19 Details of statistical analysis will be reported on a Statistical Analysis Plan.  
20  
21

### 22 23 24 ***Role of funding source***

25  
26 The sponsor has no role in study design; in the collection, analysis, and interpretation of data; in  
27  
28 the writing of the report; and in the decision to submit the paper for publication  
29  
30

### 31 32 33 ***Ethics and dissemination***

34  
35 RECORDS is funded by public grants “Programme d’Investissements d’Avenir” (PIA), part of  
36  
37 “France 2030”, reference ANR-18-RHUS-0004 and Programme Hospitalier de Recherche  
38  
39 Clinique (PHRC), reference PHRC-20-0778. The protocol was approved by the Ethics Committee  
40  
41 (*Comité de Protection des Personnes*, CPP Dijon, France), on April 6, 2020 and by the French  
42  
43 National Agency for Drug Safety (ANSM, France) on April 9, 2020. Trial results will be  
44  
45 disseminated at relevant clinical conferences and societies, published in peer-reviewed journals  
46  
47  
48  
49

### 50 51 52 ***Patients and Public Involvement***

53  
54  
55  
56  
57  
58  
59  
60

1  
2  
3 The trial protocol will be discussed with France Sepsis Association (an association of patients who  
4 recover from sepsis and families of patients who had sepsis) and trial findings will be shared with  
5  
6 this entity.  
7  
8  
9

## 10 11 12 **Discussion**

13  
14  
15  
16  
17 RECORDS is the first multicenter, placebo-controlled, biomarker-guided, adaptive Bayesian  
18 design Basket trial aimed at discovering signatures enabling administration of hydrocortisone plus  
19 fludrocortisone in patients with sepsis and determining the best chance for improved outcome with  
20 minimal risk of harm. RECORDS trial relies on the concept that benefit to risk balance of  
21 corticosteroids is greater when given to patients with sepsis and evidence of hyperinflammation  
22 and intact corticosteroids related intracellular signaling. The RECORDS trial also hypothesizes  
23 that different clinical or biological phenotypes of sepsis, i.e. CAP related sepsis, septic shock, or  
24 sepsis related ARDS, bacterial or viral sepsis, may share common signatures relevant to  
25 corticosteroids responsiveness. The study design is highly innovative integrating a broad range of  
26 candidate biomarkers from multi-omics signatures to intelligent algorithms. Candidate biomarkers  
27 are to be selected from various sources including peer-reviewed literature and from our own  
28 consortium, thanks to the translational research program embedded into the RECORDS trial. The  
29 adaptive design of the study is a clear strength insomuch as unsatisfying biomarkers may rapidly  
30 be phased out and new biomarkers may be phased in. All assessed biomarkers must provide readily  
31 available results within 24 hours, meaning that the findings of the current trial will be easily  
32 translated into clinical practice. We must acknowledge some limits to the current trial including  
33 the fact that some complex biomarkers may not be available at all participating centers.  
34  
35  
36  
37  
38  
39  
40  
41  
42  
43  
44  
45  
46  
47  
48  
49  
50  
51  
52  
53  
54  
55  
56  
57  
58  
59  
60

1  
2  
3 RECORDS trial is a major step in the implementation of precision medicine in sepsis. Indeed,  
4  
5 personalized corticosteroid treatments for sepsis, may decrease the burden related to  
6  
7 corticosteroids complications by avoiding exposure of patients unlikely to respond to this  
8  
9 treatment.  
10  
11  
12  
13

#### 14 **Authors' contributions:**

15  
16 D. Annane, S. Chevret, J. Fleuriet, and N. Hemming have designed the study. S. Chevret is  
17  
18 responsible for statistical analysis plan. D. Annane has obtained funding for the study. D. Annane,  
19  
20 S. Chevret, J. Fleuriet, N. Heming have drafted this manuscript. F. Meziani, J. Reignier, P-L  
21  
22 Declercq, E. Mercier, G. Muller, G. Colin, X. Monnet, A. Robine, S. Siami, F. Uhel, J-P Quenot,  
23  
24 G. Plantefève, J. Badie, F. Schneider, C. Cerf, G. Troché, M. Monchi, J-P Mira, B. François  
25  
26 contributed to critical evaluation of the study design, and of the manuscript of which they approved  
27  
28 the final version and its submission for publication. All authors gave their agreement to be  
29  
30 accountable for all aspects of the work, and ensure the accuracy and integrity of any part of it.  
31  
32  
33  
34

35 **Declaration of interest:** all authors declare to have no conflict of interest to disclose  
36  
37  
38  
39

40 **Funding:** RECORDS is funded by public grants “Programme d’Investissements d’Avenir”  
41  
42 (PIA), part of “France 2030”, reference ANR-18-RHUS-0004 and French ministry of health  
43  
44 Programme Hospitalier de Recherche Clinique (PHRC), contract number PHRC-20-0778.  
45  
46  
47  
48  
49  
50  
51  
52  
53  
54  
55  
56  
57  
58  
59  
60

## References

1. [https://www.who.int/health-topics/sepsis#tab=tab\\_1](https://www.who.int/health-topics/sepsis#tab=tab_1)
2. Heming et al. Immune effects of corticosteroids in sepsis. *Front Immunol.* 2018, 9: 1736.
3. Annane et al. Corticosteroids for treating sepsis in children and adults. *Cochr. Data. Sys. Rev.* 2019; 12(12): CD002243.
4. Lamontagne. Corticosteroid therapy for sepsis: a clinical practice guideline. *BMJ.* 2018; 362.
5. Horbi et al. Dexamethsone in hospitalized patients with COVID-19. *NEJM.* 2021; 384.
6. Annane et al. Effect of treatment with low doses of hydrocortisone and fludrocortisone on mortality in patients with septic shock. *JAMA.* 2002; 288:862.
7. Sprung et al. Hydrocortisone therapy for patients with septic shock. *NEJM.* 2008; 358: 111.
8. Annane et al. Hydrocortisone plus fludrocortisone for adults with septic shock. *NEJM* 2018; 378.
9. Venkatesh et al. Adjunctive glucocorticoid therapy in patients with septic shock. *NEJM* 2018; 378: 797.
10. Antcliffe et al. Transcriptomic signatures in sepsis and a differential response to steroids. From the VANISH randomized trial. *AJRCCM.* 2019, 199:7.
11. Wong et al. Developing a clinically feasible personalized medicine approach to pediatric septic shock. *AJRCCM* 2015; 191:309.
12. Pirracchio et al. Assessment of machine learning to estimate the individual treatment effect of corticosteroids in septic shock. *JAMA Netw Open,* 3(12): e2029050, 2020.
13. Singer et al. The third international consensus definitions for sepsis and septic shock (sepsis-3). *JAMA.* 2016, 315(8): 801-810.
14. Metlay et al. Diagnosis and treatment of adults with Community-Acquired Pneumonia. An official clinical practice guideline of the American thoracic society and infectious diseases society of America. *Am J Respir Crit Care Med.* 200(7): e45-e67, 2019.

- 1  
2  
3 15. Ranieri et al. Acute respiratory distress syndrome: the Berlin definition. ARDS Definition Task  
4 Force. *JAMA*. 2012, 307: 2526-2533.  
5  
6
- 7 16. Gupta, A., Madhavan, M.V., Sehgal, K. *et al*. Extrapulmonary manifestations of COVID-19. *Nat*  
8 *Med* 26, 1017–1032 (2020).  
9  
10
- 11 17. Lansbury L, Rodrigo C, Leonardi-Bee J, Nguyen-Van-Tam J, Lim WS. Corticosteroids as  
12 adjunctive therapy in the treatment of influenza. *Cochrane Database Syst Rev*. 2019 Feb  
13 24;2(2):CD010406. doi: 10.1002/14651858.CD010406.pub3.  
14  
15
- 16 18. Annane et al. Guidelines for the diagnosis and management of critical illness-related corticosteroid  
17 insufficiency (CIRCI) in critically ill patients (Part I): Society for Critical Care Medicine (SCCM)  
18 and European Society of Intensive Care Medicine (ESICM). 2017. *Intens. Care Med*. 2017; 43(12):  
19 1751-1763.  
20  
21
- 22 19. Gaudet et al. Low endocan levels are predictive of Acute Respiratory Distress Syndrome in severe  
23 sepsis and septic shock. *J Crit Care*. 2018; 47: 121-126.  
24  
25
- 26 20. Annane et al. Monocyte distribution width as a biomarker of resistance to corticosteroids in patients  
27 with sepsis: the MOCORSEP observational study. *Intens. Care Med*. 2021; 47: 1161-1164.  
28  
29
- 30 21. Davenport et al. Genomic landscape of the individual host response and outcomes in sepsis: a  
31 prospective cohort study. *Lancet Resp. Med*. 2016; 4: 259-271.  
32  
33
- 34 22. Wong et al. Endotype transitions during the acute phase of pediatric septic shock reflect changing  
35 risk and response. *Crit Care Med*. 2018; 46(3): e242-e249.  
36  
37
- 38 23. Ellouze et al. Overexpression of GILZ in macrophages limits systematic inflammation while  
39 increasing bacterial clearance in sepsis. *Eur J Immunol*. 2020. 50(4): 589-602.  
40  
41
- 42 24. Brown et al. Cutaneous vasoconstrictor response to glucocorticoids in asthma. *Lancet*. 1991.  
43 337(8741): 576-580.  
44  
45
- 46 25. Laterre et al. Effect of seleepressin vs placebo on ventilator- and vasopressor-free days in patients  
47 with septic shock: the SEPSIS-ACT randomized clinical trial. *JAMA*. 2019; 322(15): 1476-1485.  
48  
49  
50  
51  
52  
53  
54  
55  
56  
57  
58  
59

- 1
- 2
- 3 26. Vincent et al. The SOFA (Sepsis-related Organ Failure Assessment) score to describe organ
- 4 dysfunction/failure. On behalf of the Working Group on sepsis-related problems of the European
- 5 society of intensive care medicine. *Intens Care Med.* 22(7): 707-710.
- 6
- 7
- 8
- 9 27. Herdman et al. Development and preliminary testing of the new five-level version of EQ-5D (EQ-
- 10 5D-5L). *Quality of Life Res.* 2011; 20: 1727-1736.
- 11
- 12
- 13 28. Evans L, et al. Surviving sepsis campaign: international guidelines for management of sepsis and
- 14 septic shock 2021. *Intensive Care Med.* 2021 Nov;47(11):1181-1247.
- 15
- 16
- 17 29. Brookes ST, Whitely E, Egger M, Smith GD, Mulheran PA, Peters TJ. Subgroup analyses in
- 18 randomized trials: risks of subgroup-specific analyses; power and sample size for the interaction
- 19 test. *J Clin Epidemiol.* 2004;57(3):229-36.
- 20
- 21
- 22
- 23 30. Vinnat & Chevret. Enrichment Bayesian design for randomized clinical trials using categorical
- 24 biomarkers and a binary outcome. *BMC Med Res Method.* 22(1): 54.
- 25
- 26
- 27 31. Millen et al. Bayesian assessment of the influence and interaction conditions in multipopulation
- 28 tailoring clinical trials. *J Biopharm Stat.* 24(1): 94-109.
- 29
- 30
- 31
- 32
- 33
- 34
- 35
- 36
- 37
- 38
- 39
- 40
- 41
- 42
- 43
- 44
- 45
- 46
- 47
- 48
- 49
- 50
- 51
- 52
- 53
- 54
- 55
- 56
- 57
- 58
- 59
- 60

1  
2  
3  
4  
5  
6  
7  
8  
9  
10  
11  
12  
13  
14  
15  
16  
17  
18  
19  
20  
21  
22  
23  
24  
25  
26  
27  
28  
29  
30  
31  
32  
33  
34  
35  
36  
37  
38  
39  
40  
41  
42  
43  
44  
45  
46  
47  
48  
49  
50  
51  
52  
53  
54  
55  
56  
57  
58  
59  
60

For peer review only

1  
2  
3 Legends for figures  
4

5 **Figure 1. Study flow chart describing the process of recruitment and randomization.**

6  
7 Artificial Intelligence (AI), Critical Illness-Related Corticosteroid Insufficiency (CIRCI), Dual Specificity  
8 Phosphatase 1 (DUSP-1), Fludrocortisone (FC), Glucocorticoid-Induced Leucine Zipper (GILZ),  
9 Hydrocortisone (HC), Monocyte Distribution Width (MDW), Respiratory (Resp.), Sepsis Response  
10 Signature (SRS).  
11  
12  
13  
14  
15

16 **Figure 2. Flow diagram describing the potential addition and subsequent validation of biomarkers**  
17 **during the trial**  
18  
19  
20  
21  
22  
23  
24  
25  
26  
27  
28  
29  
30  
31  
32  
33  
34  
35  
36  
37  
38  
39  
40  
41  
42  
43  
44  
45  
46  
47  
48  
49  
50  
51  
52  
53  
54  
55  
56  
57  
58  
59  
60



1  
2  
3  
4  
5  
6  
7  
8  
9  
10  
11  
12  
13  
14  
15  
16  
17  
18  
19  
20  
21  
22  
23  
24  
25  
26  
27  
28  
29  
30  
31  
32  
33  
34  
35  
36  
37  
38  
39  
40  
41  
42  
43  
44  
45  
46  
47  
48  
49  
50  
51  
52  
53  
54  
55  
56  
57  
58  
59  
60

# Recruitment

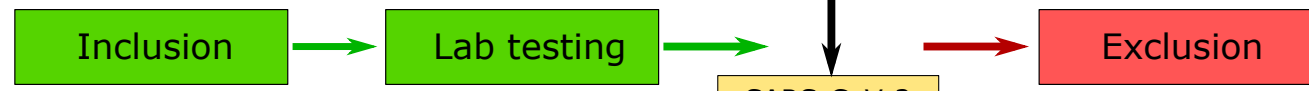

SARS-CoV-2 test

-

Influenza test

+

**Step 1**  
Random Stratum Allocation

**One-step**  
Random Treatment Allocation

**One-step**  
Random Treatment Allocation

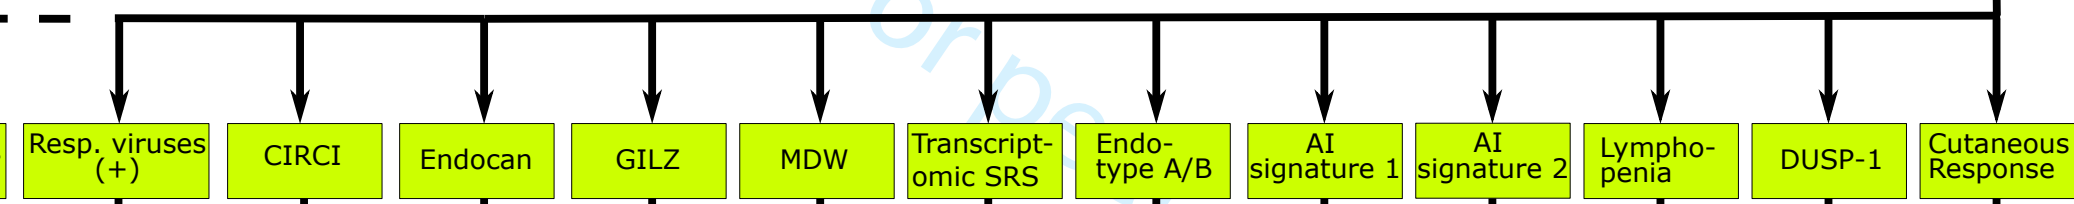

**Step 2**  
Random Treatment Allocation

Hydrocortisone & Fludrocortisone

HC Placebo & FC Placebo

Dexamethasone & Fludrocortisone

Dexamethasone & FC Placebo

Follow-up  
3 & 6 months  
after inclusion

1  
2  
3  
4 **Figure 2 Flow diagram describing the potential addition and subsequent validation of**  
5 **biomarkers during the trial**  
6  
7

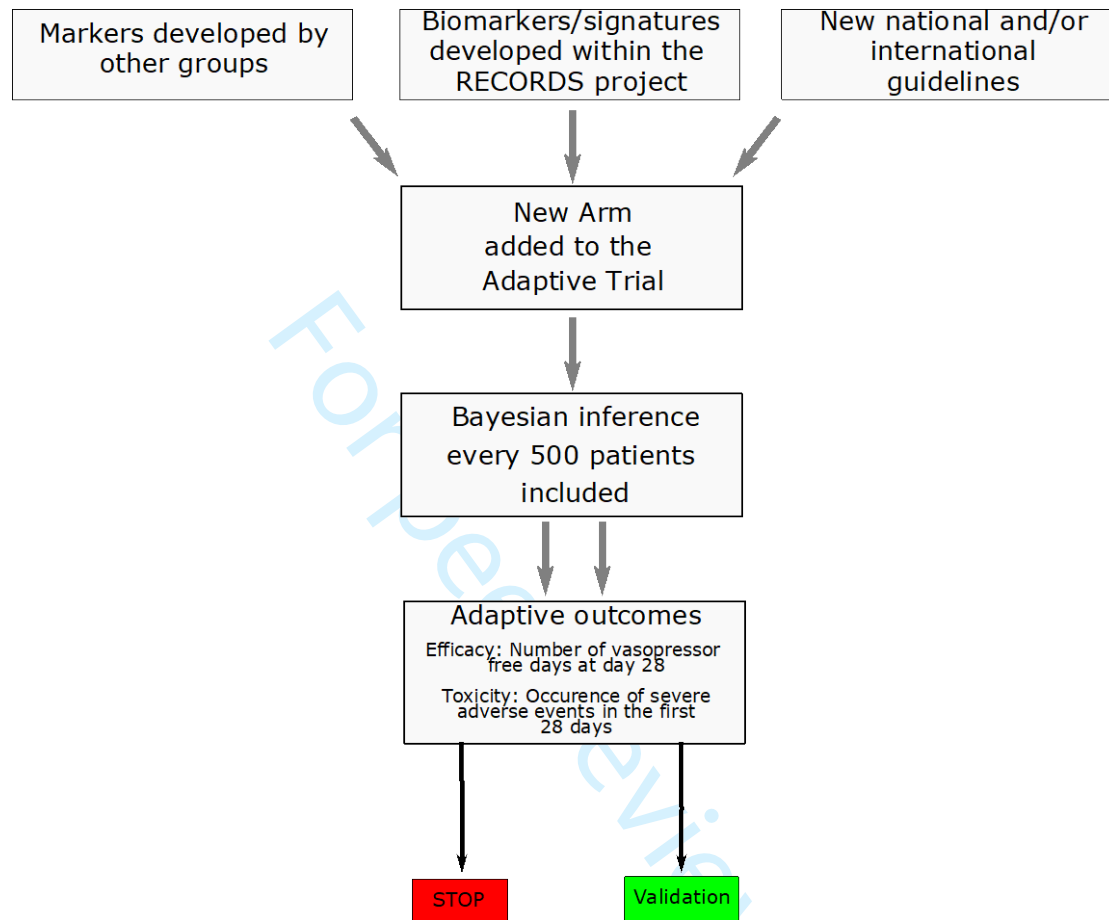

Supplement: bmjopen-2022-066496.draft_revisions.pdf [file bmjopen-2022-066496.draft_revisions.pdf]
